# Supplementary material
Source: publisher site journal article supplement (https://www.dovepress.com/article/551320)
Supplement: Supplementary file 1 [file 551320%20Supplementary%20Table.pdf]

**Supplementary Table 1: Search strategies in different databases**

**PubMed (n=307)**

| Search number | Query               | Search Details                                                                                                                                                                                                                                                                                                                                                                                                                                                                                                                                                                                                                                                                                                                                                                                                                                                                                                                                                                                                                                                                                                                                                                                                                                                                                                                                                                                                                                                                                                                                                                                                                                                                                                    | Results |
|---------------|---------------------|-------------------------------------------------------------------------------------------------------------------------------------------------------------------------------------------------------------------------------------------------------------------------------------------------------------------------------------------------------------------------------------------------------------------------------------------------------------------------------------------------------------------------------------------------------------------------------------------------------------------------------------------------------------------------------------------------------------------------------------------------------------------------------------------------------------------------------------------------------------------------------------------------------------------------------------------------------------------------------------------------------------------------------------------------------------------------------------------------------------------------------------------------------------------------------------------------------------------------------------------------------------------------------------------------------------------------------------------------------------------------------------------------------------------------------------------------------------------------------------------------------------------------------------------------------------------------------------------------------------------------------------------------------------------------------------------------------------------|---------|
| 79            | #18 AND #64 AND #78 | ("Neoplasms"[MeSH Terms] OR "cancer*"[All Fields] OR "tumor*"[All Fields] OR "neoplasm*"[All Fields] OR "malignanc*"[All Fields]) AND ("Colon"[MeSH Terms] OR "Rectum"[MeSH Terms] OR ("Intestines"[MeSH Terms] OR "Lower Gastrointestinal Tract"[MeSH Terms]) OR "colorectal"[All Fields] OR ("Colon"[MeSH Terms] OR "Colon"[All Fields] OR "colonic"[All Fields] OR "colons"[All Fields] OR "colon s"[All Fields] OR "colonal"[All Fields] OR "colonically"[All Fields] OR "colonitis"[All Fields]) OR ("Rectum"[MeSH Terms] OR "Rectum"[All Fields] OR "rectums"[All Fields]) OR ("bowel s"[All Fields] OR "bowell"[All Fields] OR "Intestines"[MeSH Terms] OR "Intestines"[All Fields] OR "bowel"[All Fields] OR "bowels"[All Fields]) OR (("lower"[All Fields] OR "lowered"[All Fields] OR "lowering"[All Fields] OR "lowerings"[All Fields] OR "lowers"[All Fields]) AND ("gastrointestinal"[All Fields] OR "gastrointestinally"[All Fields] OR "gastrointestine"[All Fields])) OR (("lower"[All Fields] OR "lowered"[All Fields] OR "lowering"[All Fields] OR "lowerings"[All Fields] OR "lowers"[All Fields]) AND "gastrointetinal"[All Fields]) OR (("lower"[All Fields] OR "lowered"[All Fields] OR "lowering"[All Fields] OR "lowerings"[All Fields] OR "lowers"[All Fields]) AND "GI"[All Fields])) AND ("Complementary Therapies"[MeSH Terms] OR ("Life Style"[MeSH Terms] OR "Healthy Lifestyle"[MeSH Terms]) OR "Exercise"[MeSH Terms] OR "Diet"[MeSH Terms] OR "Dietary Supplements"[MeSH Terms] OR "Antioxidants"[MeSH Terms] OR "Vitamin E"[MeSH Terms] OR "Plant Extracts"[MeSH Terms] OR "gosha-jinki-gan"[Supplementary Concept] OR "Glutamine"[MeSH Terms] OR "medicine, kampo"[MeSH Terms] | 307     |

|  |  |                                                                                                                                                                                                                                                                                                                                                                                                                                                                                                                                                                                                                                                                                                                                                                                                                                                                                                                                                                                                                                                                                                                                                                                                                                                                                                                                                                                                                                                                                                                                                                                                                                                                                                                                                                                                                                                                                                                                                                                                                                                                       |  |
|--|--|-----------------------------------------------------------------------------------------------------------------------------------------------------------------------------------------------------------------------------------------------------------------------------------------------------------------------------------------------------------------------------------------------------------------------------------------------------------------------------------------------------------------------------------------------------------------------------------------------------------------------------------------------------------------------------------------------------------------------------------------------------------------------------------------------------------------------------------------------------------------------------------------------------------------------------------------------------------------------------------------------------------------------------------------------------------------------------------------------------------------------------------------------------------------------------------------------------------------------------------------------------------------------------------------------------------------------------------------------------------------------------------------------------------------------------------------------------------------------------------------------------------------------------------------------------------------------------------------------------------------------------------------------------------------------------------------------------------------------------------------------------------------------------------------------------------------------------------------------------------------------------------------------------------------------------------------------------------------------------------------------------------------------------------------------------------------------|--|
|  |  | <p>OR "fatty acids, omega 3"[MeSH Terms] OR "Probiotics"[MeSH Terms] OR "Massage"[MeSH Terms] OR "manipulation, spinal"[MeSH Terms] OR "Musculoskeletal Manipulations"[MeSH Terms] OR "Hot Temperature"[MeSH Terms] OR "Cold Temperature"[MeSH Terms] OR "Yoga"[MeSH Terms] OR "Mindfulness"[MeSH Terms] OR ("Psychotherapy"[MeSH Terms] OR "psychotherapy, psychodynamic"[MeSH Terms]) OR "Movement"[MeSH Terms] OR "Education"[MeSH Terms] OR "Tai Ji"[MeSH Terms] OR ("Art"[MeSH Terms] OR "Art Therapy"[MeSH Terms]) OR ("Music"[MeSH Terms] OR "Music Therapy"[MeSH Terms]) OR ("Dancing"[MeSH Terms] OR "Dance Therapy"[MeSH Terms]) OR ("Acupuncture"[MeSH Terms] OR "Acupuncture Therapy"[MeSH Terms]) OR "Light"[MeSH Terms] OR ("Electric Stimulation"[MeSH Terms] OR "Electric Stimulation Therapy"[MeSH Terms]) OR ("complementaries"[All Fields] OR "complementary"[All Fields] OR ("Life Style"[MeSH Terms] OR ("life"[All Fields] AND "style"[All Fields]) OR "Life Style"[All Fields] OR "lifestyle"[All Fields] OR "lifestyles"[All Fields]) OR "lifetsyle"[All Fields] OR ("physical examination"[MeSH Terms] OR ("physical"[All Fields] AND "examination"[All Fields]) OR "physical examination"[All Fields] OR "physical"[All Fields] OR "physically"[All Fields] OR "physicals"[All Fields]) AND "activit*"[All Fields]) OR ("Exercise"[MeSH Terms] OR "Exercise"[All Fields] OR "exercises"[All Fields] OR "exercise therapy"[MeSH Terms] OR ("Exercise"[All Fields] AND "therapy"[All Fields]) OR "exercise therapy"[All Fields] OR "exercising"[All Fields] OR "exercise s"[All Fields] OR "exercised"[All Fields] OR "exerciser"[All Fields] OR "exercisers"[All Fields]) OR ("nutrition s"[All Fields] OR "nutritional status"[MeSH Terms] OR ("nutritional"[All Fields] AND "status"[All Fields]) OR "nutritional status"[All Fields] OR "nutrition"[All Fields] OR "nutritional sciences"[MeSH Terms] OR ("nutritional"[All Fields] AND "sciences"[All Fields]) OR "nutritional sciences"[All Fields] OR "nutritional"[All Fields] OR</p> |  |
|--|--|-----------------------------------------------------------------------------------------------------------------------------------------------------------------------------------------------------------------------------------------------------------------------------------------------------------------------------------------------------------------------------------------------------------------------------------------------------------------------------------------------------------------------------------------------------------------------------------------------------------------------------------------------------------------------------------------------------------------------------------------------------------------------------------------------------------------------------------------------------------------------------------------------------------------------------------------------------------------------------------------------------------------------------------------------------------------------------------------------------------------------------------------------------------------------------------------------------------------------------------------------------------------------------------------------------------------------------------------------------------------------------------------------------------------------------------------------------------------------------------------------------------------------------------------------------------------------------------------------------------------------------------------------------------------------------------------------------------------------------------------------------------------------------------------------------------------------------------------------------------------------------------------------------------------------------------------------------------------------------------------------------------------------------------------------------------------------|--|

|  |  |                                                                                                                                                                                                                                                                                                                                                                                                                                                                                                                                                                                                                                                                                                                                                                                                                                                                                                                                                                                                                                                                                                                                                                                                                                                                                                                                                                                                                                                                                                                                                                                                                                                                                                                                                                                                                                                                                                                                                                                                                                                                                                                                    |  |
|--|--|------------------------------------------------------------------------------------------------------------------------------------------------------------------------------------------------------------------------------------------------------------------------------------------------------------------------------------------------------------------------------------------------------------------------------------------------------------------------------------------------------------------------------------------------------------------------------------------------------------------------------------------------------------------------------------------------------------------------------------------------------------------------------------------------------------------------------------------------------------------------------------------------------------------------------------------------------------------------------------------------------------------------------------------------------------------------------------------------------------------------------------------------------------------------------------------------------------------------------------------------------------------------------------------------------------------------------------------------------------------------------------------------------------------------------------------------------------------------------------------------------------------------------------------------------------------------------------------------------------------------------------------------------------------------------------------------------------------------------------------------------------------------------------------------------------------------------------------------------------------------------------------------------------------------------------------------------------------------------------------------------------------------------------------------------------------------------------------------------------------------------------|--|
|  |  | <p>"nutritional"[All Fields] OR "nutritions"[All Fields] OR "nutritive"[All Fields]) OR ("Diet"[MeSH Terms] OR "Diet"[All Fields]) OR (("Diet"[MeSH Terms] OR "Diet"[All Fields] OR "dietary"[All Fields] OR "dietaries"[All Fields]) AND "supplement*"[All Fields]) OR "antioxidant*"[All Fields] OR ("Vitamin E"[MeSH Terms] OR "Vitamin E"[All Fields]) OR "herb*"[All Fields] OR ("herbal medicine"[MeSH Terms] OR ("herbal"[All Fields] AND "medicine"[All Fields]) OR "herbal medicine"[All Fields] OR "herbalism"[All Fields] OR "herbal"[All Fields] OR "herbals"[All Fields]) AND ("extract"[All Fields] OR "extract s"[All Fields] OR "extractabilities"[All Fields] OR "extractability"[All Fields] OR "extractable"[All Fields] OR "extractables"[All Fields] OR "extractant"[All Fields] OR "extractants"[All Fields] OR "extracted"[All Fields] OR "extractibility"[All Fields] OR "extractible"[All Fields] OR "extracting"[All Fields] OR "extraction"[All Fields] OR "extractions"[All Fields] OR "extractive"[All Fields] OR "extractives"[All Fields] OR "extracts"[All Fields])) OR ("gosha-jinki-gan"[Supplementary Concept] OR "gosha-jinki-gan"[All Fields] OR "goshajinkigan"[All Fields]) OR ("glutamin"[All Fields] OR "Glutamine"[MeSH Terms] OR "Glutamine"[All Fields] OR "glutamine s"[All Fields] OR "glutamines"[All Fields]) OR ("kampos"[All Fields] OR "medicine, kampo"[MeSH Terms] OR ("medicine"[All Fields] AND "kampo"[All Fields]) OR "kampo medicine"[All Fields] OR "kampo"[All Fields]) OR ("acetylcarnitine"[MeSH Terms] OR "acetylcarnitine"[All Fields] OR "acetyl l carnitine"[All Fields]) OR ("carnitin"[All Fields] OR "carnitine"[MeSH Terms] OR "carnitine"[All Fields] OR "carnitine s"[All Fields] OR "carnitines"[All Fields]) OR ("thioctic acid"[MeSH Terms] OR ("thioctic"[All Fields] AND "acid"[All Fields]) OR "thioctic acid"[All Fields] OR ("alpha"[All Fields] AND "lipoic"[All Fields] AND "acid"[All Fields]) OR "alpha lipoic acid"[All Fields]) OR ("fatty acids, omega 3"[MeSH Terms] OR ("fatty"[All Fields] AND "acids"[All Fields] AND "omega 3"[All</p> |  |
|--|--|------------------------------------------------------------------------------------------------------------------------------------------------------------------------------------------------------------------------------------------------------------------------------------------------------------------------------------------------------------------------------------------------------------------------------------------------------------------------------------------------------------------------------------------------------------------------------------------------------------------------------------------------------------------------------------------------------------------------------------------------------------------------------------------------------------------------------------------------------------------------------------------------------------------------------------------------------------------------------------------------------------------------------------------------------------------------------------------------------------------------------------------------------------------------------------------------------------------------------------------------------------------------------------------------------------------------------------------------------------------------------------------------------------------------------------------------------------------------------------------------------------------------------------------------------------------------------------------------------------------------------------------------------------------------------------------------------------------------------------------------------------------------------------------------------------------------------------------------------------------------------------------------------------------------------------------------------------------------------------------------------------------------------------------------------------------------------------------------------------------------------------|--|

|  |  |                                                                                                                                                                                                                                                                                                                                                                                                                                                                                                                                                                                                                                                                                                                                                                                                                                                                                                                                                                                                                                                                                                                                                                                                                                                                                                                                                                                                                                                                                                                                                                                                                                                                                                                                                                                                                                                                                                                                                                                                                                                                                |  |
|--|--|--------------------------------------------------------------------------------------------------------------------------------------------------------------------------------------------------------------------------------------------------------------------------------------------------------------------------------------------------------------------------------------------------------------------------------------------------------------------------------------------------------------------------------------------------------------------------------------------------------------------------------------------------------------------------------------------------------------------------------------------------------------------------------------------------------------------------------------------------------------------------------------------------------------------------------------------------------------------------------------------------------------------------------------------------------------------------------------------------------------------------------------------------------------------------------------------------------------------------------------------------------------------------------------------------------------------------------------------------------------------------------------------------------------------------------------------------------------------------------------------------------------------------------------------------------------------------------------------------------------------------------------------------------------------------------------------------------------------------------------------------------------------------------------------------------------------------------------------------------------------------------------------------------------------------------------------------------------------------------------------------------------------------------------------------------------------------------|--|
|  |  | <p>Fields]) OR "omega-3 fatty acids"[All Fields] OR "omega 3"[All Fields]) OR ("probiotic s"[All Fields] OR "probiotal"[All Fields] OR "Probiotics"[MeSH Terms] OR "Probiotics"[All Fields] OR "probiotic"[All Fields]) OR ("Massage"[MeSH Terms] OR "Massage"[All Fields] OR "massages"[All Fields] OR "massaged"[All Fields] OR "massager"[All Fields] OR "massagers"[All Fields] OR "massaging"[All Fields]) OR ("manipulation, spinal"[MeSH Terms] OR ("manipulation"[All Fields] AND "spinal"[All Fields]) OR "spinal manipulation"[All Fields] OR ("spinal"[All Fields] AND "manipulation"[All Fields])) OR (("manual s"[All Fields] OR "manualization"[All Fields] OR "manualized"[All Fields] OR "manually"[All Fields] OR "manuals as topic"[MeSH Terms] OR ("manuals"[All Fields] AND "topic"[All Fields]) OR "manuals as topic"[All Fields] OR "manual"[All Fields] OR "manuals"[All Fields]) AND "therap*"[All Fields]) OR ("Hot Temperature"[MeSH Terms] OR ("hot"[All Fields] AND "temperature"[All Fields]) OR "Hot Temperature"[All Fields] OR "heat"[All Fields]) OR ("common cold"[MeSH Terms] OR ("common"[All Fields] AND "cold"[All Fields]) OR "common cold"[All Fields] OR "cold"[All Fields] OR "Cold Temperature"[MeSH Terms] OR ("cold"[All Fields] AND "temperature"[All Fields]) OR "Cold Temperature"[All Fields]) OR (("touch"[MeSH Terms] OR "touch"[All Fields] OR "touched"[All Fields] OR "touches"[All Fields] OR "touching"[All Fields] OR "touchings"[All Fields]) AND ("therapeutics"[MeSH Terms] OR "therapeutics"[All Fields] OR "therapies"[All Fields] OR "therapy"[MeSH Subheading] OR "therapy"[All Fields] OR "therapy s"[All Fields] OR "therapys"[All Fields])) OR ("mind-body"[All Fields] AND ("practicability"[All Fields] OR "practicable"[All Fields] OR "practical"[All Fields] OR "practicalities"[All Fields] OR "practicality"[All Fields] OR "practically"[All Fields] OR "practicals"[All Fields] OR "practice"[All Fields] OR "practice s"[All Fields] OR "practiced"[All Fields] OR "practices"[All Fields] OR</p> |  |
|--|--|--------------------------------------------------------------------------------------------------------------------------------------------------------------------------------------------------------------------------------------------------------------------------------------------------------------------------------------------------------------------------------------------------------------------------------------------------------------------------------------------------------------------------------------------------------------------------------------------------------------------------------------------------------------------------------------------------------------------------------------------------------------------------------------------------------------------------------------------------------------------------------------------------------------------------------------------------------------------------------------------------------------------------------------------------------------------------------------------------------------------------------------------------------------------------------------------------------------------------------------------------------------------------------------------------------------------------------------------------------------------------------------------------------------------------------------------------------------------------------------------------------------------------------------------------------------------------------------------------------------------------------------------------------------------------------------------------------------------------------------------------------------------------------------------------------------------------------------------------------------------------------------------------------------------------------------------------------------------------------------------------------------------------------------------------------------------------------|--|

|  |                                                                                                                                                                                                                                                                                                                                                                                                                                                                                                                                                                                                                                                                                                                                                                                                                                                                                                                                                                                                                                                                                                                                                                                                                                                                                                                                                                                                                                                                                                                                                                                                                                                                                                                                                                                                                                                                                                                                                                                                                                                                                        |  |
|--|----------------------------------------------------------------------------------------------------------------------------------------------------------------------------------------------------------------------------------------------------------------------------------------------------------------------------------------------------------------------------------------------------------------------------------------------------------------------------------------------------------------------------------------------------------------------------------------------------------------------------------------------------------------------------------------------------------------------------------------------------------------------------------------------------------------------------------------------------------------------------------------------------------------------------------------------------------------------------------------------------------------------------------------------------------------------------------------------------------------------------------------------------------------------------------------------------------------------------------------------------------------------------------------------------------------------------------------------------------------------------------------------------------------------------------------------------------------------------------------------------------------------------------------------------------------------------------------------------------------------------------------------------------------------------------------------------------------------------------------------------------------------------------------------------------------------------------------------------------------------------------------------------------------------------------------------------------------------------------------------------------------------------------------------------------------------------------------|--|
|  | <p>"practicing"[All Fields])) OR ("Yoga"[MeSH Terms] OR "Yoga"[All Fields]) OR ("mediated"[All Fields] OR "mediational"[All Fields] OR "mediator"[All Fields] OR "mediators"[All Fields] OR "mediators"[All Fields] OR "negotiating"[MeSH Terms] OR "negotiating"[All Fields] OR "mediate"[All Fields] OR "mediates"[All Fields] OR "mediating"[All Fields] OR "mediation"[All Fields] OR "mediations"[All Fields]) OR ("mind s"[All Fields] OR "minded"[All Fields] OR "mindful"[All Fields] OR "Mindfulness"[MeSH Terms] OR "Mindfulness"[All Fields] OR "minding"[All Fields] OR "minds"[All Fields]) OR ("spiritual"[All Fields] OR "spiritualism"[MeSH Terms] OR "spiritualism"[All Fields] OR "spirituality"[MeSH Terms] OR "spirituality"[All Fields] OR "spiritualities"[All Fields] OR "spirituality s"[All Fields] OR "spiritually"[All Fields] OR "spirituals"[All Fields]) AND ("practicability"[All Fields] OR "practicable"[All Fields] OR "practical"[All Fields] OR "practicalities"[All Fields] OR "practicality"[All Fields] OR "practically"[All Fields] OR "practicals"[All Fields] OR "practice"[All Fields] OR "practice s"[All Fields] OR "practiced"[All Fields] OR "practices"[All Fields] OR "practicing"[All Fields])) OR ("psychotherapie"[All Fields] OR "Psychotherapy"[MeSH Terms] OR "Psychotherapy"[All Fields] OR "psychotherapies"[All Fields] OR "psychotherapy s"[All Fields]) OR ("breath"[All Fields] OR "breathe"[All Fields] OR "breathed"[All Fields] OR "breathes"[All Fields] OR "breathings"[All Fields] OR "breaths"[All Fields] OR "respiration"[MeSH Terms] OR "respiration"[All Fields] OR "breathing"[All Fields]) AND ("relaxation therapy"[MeSH Terms] OR ("relaxation"[All Fields] AND "therapy"[All Fields]) OR "relaxation therapy"[All Fields] OR ("relaxation"[All Fields] AND "techniques"[All Fields]) OR "relaxation techniques"[All Fields])) OR ("Movement"[MeSH Terms] OR "Movement"[All Fields] OR "movements"[All Fields] OR "movement s"[All Fields]) OR ("educability"[All Fields] OR "educable"[All Fields] OR</p> |  |
|--|----------------------------------------------------------------------------------------------------------------------------------------------------------------------------------------------------------------------------------------------------------------------------------------------------------------------------------------------------------------------------------------------------------------------------------------------------------------------------------------------------------------------------------------------------------------------------------------------------------------------------------------------------------------------------------------------------------------------------------------------------------------------------------------------------------------------------------------------------------------------------------------------------------------------------------------------------------------------------------------------------------------------------------------------------------------------------------------------------------------------------------------------------------------------------------------------------------------------------------------------------------------------------------------------------------------------------------------------------------------------------------------------------------------------------------------------------------------------------------------------------------------------------------------------------------------------------------------------------------------------------------------------------------------------------------------------------------------------------------------------------------------------------------------------------------------------------------------------------------------------------------------------------------------------------------------------------------------------------------------------------------------------------------------------------------------------------------------|--|

|  |  |                                                                                                                                                                                                                                                                                                                                                                                                                                                                                                                                                                                                                                                                                                                                                                                                                                                                                                                                                                                                                                                                                                                                                                                                                                                                                                                                                                                                                                                                                                                                                                                                                                                                                                                                                                                                                                                                                                                                                                                                                                                                                                                                                   |  |
|--|--|---------------------------------------------------------------------------------------------------------------------------------------------------------------------------------------------------------------------------------------------------------------------------------------------------------------------------------------------------------------------------------------------------------------------------------------------------------------------------------------------------------------------------------------------------------------------------------------------------------------------------------------------------------------------------------------------------------------------------------------------------------------------------------------------------------------------------------------------------------------------------------------------------------------------------------------------------------------------------------------------------------------------------------------------------------------------------------------------------------------------------------------------------------------------------------------------------------------------------------------------------------------------------------------------------------------------------------------------------------------------------------------------------------------------------------------------------------------------------------------------------------------------------------------------------------------------------------------------------------------------------------------------------------------------------------------------------------------------------------------------------------------------------------------------------------------------------------------------------------------------------------------------------------------------------------------------------------------------------------------------------------------------------------------------------------------------------------------------------------------------------------------------------|--|
|  |  | <p>"educates"[All Fields] OR "Education"[MeSH Subheading] OR "Education"[All Fields] OR "educational status"[MeSH Terms] OR ("educational"[All Fields] AND "status"[All Fields]) OR "educational status"[All Fields] OR "Education"[MeSH Terms] OR "education s"[All Fields] OR "educational"[All Fields] OR "educative"[All Fields] OR "educator"[All Fields] OR "educator s"[All Fields] OR "educators"[All Fields] OR "teaching"[MeSH Terms] OR "teaching"[All Fields] OR "educate"[All Fields] OR "educated"[All Fields] OR "educating"[All Fields] OR "educations"[All Fields] OR ("Tai Ji"[MeSH Terms] OR ("tai"[All Fields] AND "ji"[All Fields]) OR "Tai Ji"[All Fields] OR ("tai"[All Fields] AND "chi"[All Fields]) OR "tai chi"[All Fields]) OR ("Art"[MeSH Terms] OR "Art"[All Fields]) OR ("Music"[MeSH Terms] OR "Music"[All Fields] OR "music s"[All Fields] OR "musical"[All Fields] OR "musicality"[All Fields] OR "musically"[All Fields] OR "musicals"[All Fields] OR "musics"[All Fields]) OR ("danced"[All Fields] OR "Dancing"[MeSH Terms] OR "Dancing"[All Fields] OR "dance"[All Fields] OR "dances"[All Fields]) OR ("acupunctural"[All Fields] OR "Acupuncture"[MeSH Terms] OR "Acupuncture"[All Fields] OR "Acupuncture Therapy"[MeSH Terms] OR ("Acupuncture"[All Fields] AND "therapy"[All Fields]) OR "Acupuncture Therapy"[All Fields] OR "acupuncture s"[All Fields] OR "acupunctured"[All Fields] OR "acupunctures"[All Fields] OR "acupuncturing"[All Fields]) OR ("Light"[MeSH Terms] OR "Light"[All Fields] OR "lighted"[All Fields] OR "lights"[All Fields] OR "lighting"[MeSH Terms] OR "lighting"[All Fields] OR "lightings"[All Fields] OR "lightness"[All Fields] OR "lightnesses"[All Fields]) AND ("stimulate"[All Fields] OR "stimulated"[All Fields] OR "stimulates"[All Fields] OR "stimulating"[All Fields] OR "stimulation"[All Fields] OR "stimulations"[All Fields] OR "stimulative"[All Fields] OR "stimulator"[All Fields] OR "stimulator s"[All Fields] OR "stimulators"[All Fields])) OR ("Electric Stimulation"[MeSH Terms] OR ("electric"[All Fields] AND "stimulation"[All Fields]))</p> |  |
|--|--|---------------------------------------------------------------------------------------------------------------------------------------------------------------------------------------------------------------------------------------------------------------------------------------------------------------------------------------------------------------------------------------------------------------------------------------------------------------------------------------------------------------------------------------------------------------------------------------------------------------------------------------------------------------------------------------------------------------------------------------------------------------------------------------------------------------------------------------------------------------------------------------------------------------------------------------------------------------------------------------------------------------------------------------------------------------------------------------------------------------------------------------------------------------------------------------------------------------------------------------------------------------------------------------------------------------------------------------------------------------------------------------------------------------------------------------------------------------------------------------------------------------------------------------------------------------------------------------------------------------------------------------------------------------------------------------------------------------------------------------------------------------------------------------------------------------------------------------------------------------------------------------------------------------------------------------------------------------------------------------------------------------------------------------------------------------------------------------------------------------------------------------------------|--|

|  |  |                                                                                                                                                                                                                                                                                                                                                                                                                                                                                                                                                                                                                                                                                                                                                                                                                                                                                                                                                                                                                                                                                                                                                                                                                                                                                                                                                                                                                                                                                                                                                                                                                                                                                                                                                                                                                                                                                                                                                                                                                                                                   |  |
|--|--|-------------------------------------------------------------------------------------------------------------------------------------------------------------------------------------------------------------------------------------------------------------------------------------------------------------------------------------------------------------------------------------------------------------------------------------------------------------------------------------------------------------------------------------------------------------------------------------------------------------------------------------------------------------------------------------------------------------------------------------------------------------------------------------------------------------------------------------------------------------------------------------------------------------------------------------------------------------------------------------------------------------------------------------------------------------------------------------------------------------------------------------------------------------------------------------------------------------------------------------------------------------------------------------------------------------------------------------------------------------------------------------------------------------------------------------------------------------------------------------------------------------------------------------------------------------------------------------------------------------------------------------------------------------------------------------------------------------------------------------------------------------------------------------------------------------------------------------------------------------------------------------------------------------------------------------------------------------------------------------------------------------------------------------------------------------------|--|
|  |  | <p>OR "Electric Stimulation"[All Fields] OR ("electrical"[All Fields] AND "stimulation"[All Fields]) OR "electrical stimulation"[All Fields]) OR (("magnet s"[All Fields] OR "magnetical"[All Fields] OR "magnetically"[All Fields] OR "magnetics"[MeSH Terms] OR "magnetics"[All Fields] OR "magnetic"[All Fields] OR "magnetisation"[All Fields] OR "magnetisations"[All Fields] OR "magnetised"[All Fields] OR "magnetism"[All Fields] OR "magnetisms"[All Fields] OR "magnetization"[All Fields] OR "magnetizations"[All Fields] OR "magnetize"[All Fields] OR "magnetized"[All Fields] OR "magnetizing"[All Fields] OR "magnets"[MeSH Terms] OR "magnets"[All Fields] OR "magnet"[All Fields]) AND ("stimulate"[All Fields] OR "stimulated"[All Fields] OR "stimulates"[All Fields] OR "stimulating"[All Fields] OR "stimulation"[All Fields] OR "stimulations"[All Fields] OR "stimulative"[All Fields] OR "stimulator"[All Fields] OR "stimulator s"[All Fields] OR "stimulators"[All Fields]))) AND (((("Peripheral Nervous System Diseases"[MeSH Terms] OR ("peripheral"[All Fields] OR "peripherally"[All Fields] OR "peripherals"[All Fields] OR "periphoreal"[All Fields] OR "peripheric"[All Fields] OR "peripherically"[All Fields]) AND "neuropath*"[All Fields])) AND ("Oxaliplatin"[MeSH Terms] OR ("chemotherapy s"[All Fields] OR "drug therapy"[MeSH Terms] OR ("drug"[All Fields] AND "therapy"[All Fields]) OR "drug therapy"[All Fields] OR "chemotherapies"[All Fields] OR "drug therapy"[MeSH Subheading] OR "chemotherapy"[All Fields]) OR ("Oxaliplatin"[MeSH Terms] OR "Oxaliplatin"[All Fields] OR "oxaliplatine"[All Fields] OR "oxaliplatin s"[All Fields]))) OR ("chemotherapy-induced"[All Fields] AND ("Peripheral Nervous System Diseases"[MeSH Terms] OR ("peripheral"[All Fields] AND "nervous"[All Fields] AND "system"[All Fields] AND "diseases"[All Fields]) OR "Peripheral Nervous System Diseases"[All Fields] OR ("peripheral"[All Fields] AND "neuropathy"[All Fields]) OR "peripheral neuropathy"[All Fields]))</p> |  |
|--|--|-------------------------------------------------------------------------------------------------------------------------------------------------------------------------------------------------------------------------------------------------------------------------------------------------------------------------------------------------------------------------------------------------------------------------------------------------------------------------------------------------------------------------------------------------------------------------------------------------------------------------------------------------------------------------------------------------------------------------------------------------------------------------------------------------------------------------------------------------------------------------------------------------------------------------------------------------------------------------------------------------------------------------------------------------------------------------------------------------------------------------------------------------------------------------------------------------------------------------------------------------------------------------------------------------------------------------------------------------------------------------------------------------------------------------------------------------------------------------------------------------------------------------------------------------------------------------------------------------------------------------------------------------------------------------------------------------------------------------------------------------------------------------------------------------------------------------------------------------------------------------------------------------------------------------------------------------------------------------------------------------------------------------------------------------------------------|--|

|    |                                        |                                                                                                                                                                                                                                                                                                                                                                                                                                                                                                                                                                                                                                                                                                                                                                                                                                                                                                                                                                                                                                                                                                                                                                                                                                                                                                                                                                                                                                                                                                |        |
|----|----------------------------------------|------------------------------------------------------------------------------------------------------------------------------------------------------------------------------------------------------------------------------------------------------------------------------------------------------------------------------------------------------------------------------------------------------------------------------------------------------------------------------------------------------------------------------------------------------------------------------------------------------------------------------------------------------------------------------------------------------------------------------------------------------------------------------------------------------------------------------------------------------------------------------------------------------------------------------------------------------------------------------------------------------------------------------------------------------------------------------------------------------------------------------------------------------------------------------------------------------------------------------------------------------------------------------------------------------------------------------------------------------------------------------------------------------------------------------------------------------------------------------------------------|--------|
|    |                                        | <p>OR ("oxaliplatin-induced"[All Fields] AND ("Peripheral Nervous System Diseases"[MeSH Terms] OR ("peripheral"[All Fields] AND "nervous"[All Fields] AND "system"[All Fields] AND "diseases"[All Fields]) OR "Peripheral Nervous System Diseases"[All Fields] OR ("peripheral"[All Fields] AND "neuropathy"[All Fields]) OR "peripheral neuropathy"[All Fields])) OR "CIPN"[All Fields] OR "OIPN"[All Fields] OR "OXAI PN"[All Fields])</p>                                                                                                                                                                                                                                                                                                                                                                                                                                                                                                                                                                                                                                                                                                                                                                                                                                                                                                                                                                                                                                                   |        |
| 78 | #72 OR #73 OR #74 OR #75 OR #76 OR #77 | <p>((("Peripheral Nervous System Diseases"[MeSH Terms] OR ("peripheral"[All Fields] OR "peripherally"[All Fields] OR "peripherals"[All Fields] OR "periphoreal"[All Fields] OR "peripheric"[All Fields] OR "peripherically"[All Fields]) AND "neuropath*" [All Fields])) AND ("Oxaliplatin"[MeSH Terms] OR ("chemotherapy s"[All Fields] OR "drug therapy"[MeSH Terms] OR ("drug"[All Fields] AND "therapy"[All Fields]) OR "drug therapy"[All Fields] OR "chemotherapies"[All Fields] OR "drug therapy"[MeSH Subheading] OR "chemotherapy"[All Fields]) OR ("Oxaliplatin"[MeSH Terms] OR "Oxaliplatin"[All Fields] OR "oxaliplatine"[All Fields] OR "oxaliplatin s"[All Fields]))) OR ("chemotherapy-induced"[All Fields] AND ("Peripheral Nervous System Diseases"[MeSH Terms] OR ("peripheral"[All Fields] AND "nervous"[All Fields] AND "system"[All Fields] AND "diseases"[All Fields]) OR "Peripheral Nervous System Diseases"[All Fields] OR ("peripheral"[All Fields] AND "neuropathy"[All Fields]) OR "peripheral neuropathy"[All Fields])) OR ("oxaliplatin-induced"[All Fields] AND ("Peripheral Nervous System Diseases"[MeSH Terms] OR ("peripheral"[All Fields] AND "nervous"[All Fields] AND "system"[All Fields] AND "diseases"[All Fields]) OR "Peripheral Nervous System Diseases"[All Fields] OR ("peripheral"[All Fields] AND "neuropathy"[All Fields]) OR "peripheral neuropathy"[All Fields])) OR "CIPN"[All Fields] OR "OIPN"[All Fields] OR "OXAI PN"[All Fields])</p> | 38,578 |

|    |                                            |                                                                                                                                                                                                                                                                                                                                                                                                                                                                                                                                                                                                                                                                              |           |
|----|--------------------------------------------|------------------------------------------------------------------------------------------------------------------------------------------------------------------------------------------------------------------------------------------------------------------------------------------------------------------------------------------------------------------------------------------------------------------------------------------------------------------------------------------------------------------------------------------------------------------------------------------------------------------------------------------------------------------------------|-----------|
| 77 | OXAIPN                                     | "OXAIPN"[All Fields]                                                                                                                                                                                                                                                                                                                                                                                                                                                                                                                                                                                                                                                         | 21        |
| 76 | OIPN                                       | "OIPN"[All Fields]                                                                                                                                                                                                                                                                                                                                                                                                                                                                                                                                                                                                                                                           | 100       |
| 75 | CIPN                                       | "CIPN"[All Fields]                                                                                                                                                                                                                                                                                                                                                                                                                                                                                                                                                                                                                                                           | 1,499     |
| 74 | oxaliplatin-induced peripheral neuropathy  | "oxaliplatin-induced"[All Fields] AND ("peripheral nervous system diseases"[MeSH Terms] OR ("peripheral"[All Fields] AND "nervous"[All Fields] AND "system"[All Fields] AND "diseases"[All Fields]) OR "peripheral nervous system diseases"[All Fields] OR ("peripheral"[All Fields] AND "neuropathy"[All Fields]) OR "peripheral neuropathy"[All Fields])                                                                                                                                                                                                                                                                                                                   | 608       |
| 73 | chemotherapy-induced peripheral neuropathy | "chemotherapy-induced"[All Fields] AND ("peripheral nervous system diseases"[MeSH Terms] OR ("peripheral"[All Fields] AND "nervous"[All Fields] AND "system"[All Fields] AND "diseases"[All Fields]) OR "peripheral nervous system diseases"[All Fields] OR ("peripheral"[All Fields] AND "neuropathy"[All Fields]) OR "peripheral neuropathy"[All Fields])                                                                                                                                                                                                                                                                                                                  | 2,555     |
| 72 | #67 AND #71                                | ("Peripheral Nervous System Diseases"[MeSH Terms] OR ("peripheral"[All Fields] OR "peripherally"[All Fields] OR "peripherals"[All Fields] OR "periphoreal"[All Fields] OR "peripheric"[All Fields] OR "peripherically"[All Fields]) AND "neuropath*"[All Fields])) AND ("Oxaliplatin"[MeSH Terms] OR ("chemotherapy s"[All Fields] OR "drug therapy"[MeSH Terms] OR ("drug"[All Fields] AND "therapy"[All Fields]) OR "drug therapy"[All Fields] OR "chemotherapies"[All Fields] OR "drug therapy"[MeSH Subheading] OR "chemotherapy"[All Fields]) OR ("Oxaliplatin"[MeSH Terms] OR "Oxaliplatin"[All Fields] OR "oxaliplatine"[All Fields] OR "oxaliplatin s"[All Fields])) | 38,504    |
| 71 | #68 OR #69 OR #70                          | "Oxaliplatin"[MeSH Terms] OR ("chemotherapy s"[All Fields] OR "drug therapy"[MeSH Terms] OR ("drug"[All Fields] AND "therapy"[All Fields]) OR "drug therapy"[All Fields] OR "chemotherapies"[All Fields] OR "drug therapy"[MeSH Subheading] OR "chemotherapy"[All Fields]) OR ("Oxaliplatin"[MeSH Terms] OR "Oxaliplatin"[All Fields] OR "oxaliplatine"[All Fields] OR "oxaliplatin s"[All Fields])                                                                                                                                                                                                                                                                          | 4,149,936 |

|    |                                            |                                                                                                                                                                                                                                                                                                                                                                                                                                                                                                                                                                                                                                                                                                                                                                                                                                                                   |           |
|----|--------------------------------------------|-------------------------------------------------------------------------------------------------------------------------------------------------------------------------------------------------------------------------------------------------------------------------------------------------------------------------------------------------------------------------------------------------------------------------------------------------------------------------------------------------------------------------------------------------------------------------------------------------------------------------------------------------------------------------------------------------------------------------------------------------------------------------------------------------------------------------------------------------------------------|-----------|
| 70 | oxaliplatin                                | "oxaliplatin"[MeSH Terms] OR "oxaliplatin"[All Fields] OR "oxaliplatine"[All Fields] OR "oxaliplatin s"[All Fields]                                                                                                                                                                                                                                                                                                                                                                                                                                                                                                                                                                                                                                                                                                                                               | 16,847    |
| 69 | chemotherapy                               | "chemotherapy s"[All Fields] OR "drug therapy"[MeSH Terms] OR ("drug"[All Fields] AND "therapy"[All Fields]) OR "drug therapy"[All Fields] OR "chemotherapies"[All Fields] OR "drug therapy"[MeSH Subheading] OR "chemotherapy"[All Fields]                                                                                                                                                                                                                                                                                                                                                                                                                                                                                                                                                                                                                       | 4,147,928 |
| 68 | "Oxaliplatin"[Mesh]                        | "Oxaliplatin"[MeSH Terms]                                                                                                                                                                                                                                                                                                                                                                                                                                                                                                                                                                                                                                                                                                                                                                                                                                         | 8,925     |
| 67 | #65 OR #66                                 | "Peripheral Nervous System Diseases"[MeSH Terms] OR (("peripheral"[All Fields] OR "peripherally"[All Fields] OR "peripherals"[All Fields] OR "periphereal"[All Fields] OR "peripheric"[All Fields] OR "peripherically"[All Fields]) AND "neuropath*"[All Fields])                                                                                                                                                                                                                                                                                                                                                                                                                                                                                                                                                                                                 | 198,943   |
| 66 | peripheral neuropath*                      | ("peripheral"[All Fields] OR "peripherally"[All Fields] OR "peripherals"[All Fields] OR "periphereal"[All Fields] OR "peripheric"[All Fields] OR "peripherically"[All Fields]) AND "neuropath*"[All Fields]                                                                                                                                                                                                                                                                                                                                                                                                                                                                                                                                                                                                                                                       | 58,209    |
| 65 | "Peripheral Nervous System Diseases"[Mesh] | "Peripheral Nervous System Diseases"[MeSH Terms]                                                                                                                                                                                                                                                                                                                                                                                                                                                                                                                                                                                                                                                                                                                                                                                                                  | 173,502   |
| 64 | #19 OR #63                                 | "Complementary Therapies"[MeSH Terms] OR ("Life Style"[MeSH Terms] OR "Healthy Lifestyle"[MeSH Terms]) OR "Exercise"[MeSH Terms] OR "Diet"[MeSH Terms] OR "Dietary Supplements"[MeSH Terms] OR "Antioxidants"[MeSH Terms] OR "Vitamin E"[MeSH Terms] OR "Plant Extracts"[MeSH Terms] OR "gosha-jinki-gan"[Supplementary Concept] OR "Glutamine"[MeSH Terms] OR "medicine, kampo"[MeSH Terms] OR "fatty acids, omega 3"[MeSH Terms] OR "Probiotics"[MeSH Terms] OR "Massage"[MeSH Terms] OR "manipulation, spinal"[MeSH Terms] OR "Musculoskeletal Manipulations"[MeSH Terms] OR "Hot Temperature"[MeSH Terms] OR "Cold Temperature"[MeSH Terms] OR "Yoga"[MeSH Terms] OR "Mindfulness"[MeSH Terms] OR ("Psychotherapy"[MeSH Terms] OR "psychotherapy, psychodynamic"[MeSH Terms]) OR "Movement"[MeSH Terms] OR "Education"[MeSH Terms] OR "Tai Ji"[MeSH Terms] OR | 9,149,232 |

|  |  |                                                                                                                                                                                                                                                                                                                                                                                                                                                                                                                                                                                                                                                                                                                                                                                                                                                                                                                                                                                                                                                                                                                                                                                                                                                                                                                                                                                                                                                                                                                                                                                                                                                                                                                                                                                                                                                                                                                                                                                                                                                                                                                                                                                                                                                             |  |
|--|--|-------------------------------------------------------------------------------------------------------------------------------------------------------------------------------------------------------------------------------------------------------------------------------------------------------------------------------------------------------------------------------------------------------------------------------------------------------------------------------------------------------------------------------------------------------------------------------------------------------------------------------------------------------------------------------------------------------------------------------------------------------------------------------------------------------------------------------------------------------------------------------------------------------------------------------------------------------------------------------------------------------------------------------------------------------------------------------------------------------------------------------------------------------------------------------------------------------------------------------------------------------------------------------------------------------------------------------------------------------------------------------------------------------------------------------------------------------------------------------------------------------------------------------------------------------------------------------------------------------------------------------------------------------------------------------------------------------------------------------------------------------------------------------------------------------------------------------------------------------------------------------------------------------------------------------------------------------------------------------------------------------------------------------------------------------------------------------------------------------------------------------------------------------------------------------------------------------------------------------------------------------------|--|
|  |  | <p>( "Art"[MeSH Terms] OR "Art Therapy"[MeSH Terms]) OR<br/> ("Music"[MeSH Terms] OR "Music Therapy"[MeSH Terms]) OR<br/> ("Dancing"[MeSH Terms] OR "Dance Therapy"[MeSH Terms])<br/> OR ("Acupuncture"[MeSH Terms] OR "Acupuncture<br/> Therapy"[MeSH Terms]) OR "Light"[MeSH Terms] OR ("Electric<br/> Stimulation"[MeSH Terms] OR "Electric Stimulation<br/> Therapy"[MeSH Terms]) OR ("complementaries"[All Fields] OR<br/> "complementary"[All Fields] OR ("Life Style"[MeSH Terms] OR<br/> ("life"[All Fields] AND "style"[All Fields]) OR "Life Style"[All<br/> Fields] OR "lifestyle"[All Fields] OR "lifestyles"[All Fields]) OR<br/> "lifetsyle"[All Fields] OR (("physical examination"[MeSH Terms]<br/> OR ("physical"[All Fields] AND "examination"[All Fields]) OR<br/> "physical examination"[All Fields] OR "physical"[All Fields] OR<br/> "physically"[All Fields] OR "physicals"[All Fields]) AND<br/> "activit*" [All Fields]) OR ("Exercise"[MeSH Terms] OR<br/> "Exercise"[All Fields] OR "exercises"[All Fields] OR "exercise<br/> therapy"[MeSH Terms] OR ("Exercise"[All Fields] AND<br/> "therapy"[All Fields]) OR "exercise therapy"[All Fields] OR<br/> "exercising"[All Fields] OR "exercise s"[All Fields] OR<br/> "exercised"[All Fields] OR "exerciser"[All Fields] OR<br/> "exercisers"[All Fields]) OR ("nutrition s"[All Fields] OR<br/> "nutritional status"[MeSH Terms] OR ("nutritional"[All Fields]<br/> AND "status"[All Fields]) OR "nutritional status"[All Fields] OR<br/> "nutrition"[All Fields] OR "nutritional sciences"[MeSH Terms] OR<br/> ("nutritional"[All Fields] AND "sciences"[All Fields]) OR<br/> "nutritional sciences"[All Fields] OR "nutritional"[All Fields] OR<br/> "nutritious"[All Fields] OR "nutritions"[All Fields] OR<br/> "nutritive"[All Fields]) OR ("Diet"[MeSH Terms] OR "Diet"[All<br/> Fields]) OR (("Diet"[MeSH Terms] OR "Diet"[All Fields] OR<br/> "dietary"[All Fields] OR "dietaries"[All Fields]) AND<br/> "supplement*" [All Fields]) OR "antioxidant*" [All Fields] OR<br/> ("Vitamin E"[MeSH Terms] OR "Vitamin E"[All Fields]) OR<br/> "herb*" [All Fields] OR ("herbal medicine"[MeSH Terms] OR<br/> ("herbal"[All Fields] AND "medicine"[All Fields]) OR "herbal</p> |  |
|--|--|-------------------------------------------------------------------------------------------------------------------------------------------------------------------------------------------------------------------------------------------------------------------------------------------------------------------------------------------------------------------------------------------------------------------------------------------------------------------------------------------------------------------------------------------------------------------------------------------------------------------------------------------------------------------------------------------------------------------------------------------------------------------------------------------------------------------------------------------------------------------------------------------------------------------------------------------------------------------------------------------------------------------------------------------------------------------------------------------------------------------------------------------------------------------------------------------------------------------------------------------------------------------------------------------------------------------------------------------------------------------------------------------------------------------------------------------------------------------------------------------------------------------------------------------------------------------------------------------------------------------------------------------------------------------------------------------------------------------------------------------------------------------------------------------------------------------------------------------------------------------------------------------------------------------------------------------------------------------------------------------------------------------------------------------------------------------------------------------------------------------------------------------------------------------------------------------------------------------------------------------------------------|--|

|  |  |                                                                                                                                                                                                                                                                                                                                                                                                                                                                                                                                                                                                                                                                                                                                                                                                                                                                                                                                                                                                                                                                                                                                                                                                                                                                                                                                                                                                                                                                                                                                                                                                                                                                                                                                                                                                                                                                                                                                                                                                                                                                                                                                |  |
|--|--|--------------------------------------------------------------------------------------------------------------------------------------------------------------------------------------------------------------------------------------------------------------------------------------------------------------------------------------------------------------------------------------------------------------------------------------------------------------------------------------------------------------------------------------------------------------------------------------------------------------------------------------------------------------------------------------------------------------------------------------------------------------------------------------------------------------------------------------------------------------------------------------------------------------------------------------------------------------------------------------------------------------------------------------------------------------------------------------------------------------------------------------------------------------------------------------------------------------------------------------------------------------------------------------------------------------------------------------------------------------------------------------------------------------------------------------------------------------------------------------------------------------------------------------------------------------------------------------------------------------------------------------------------------------------------------------------------------------------------------------------------------------------------------------------------------------------------------------------------------------------------------------------------------------------------------------------------------------------------------------------------------------------------------------------------------------------------------------------------------------------------------|--|
|  |  | <p> medicine"[All Fields] OR "herbalism"[All Fields] OR "herbal"[All Fields] OR "herbals"[All Fields]) AND ("extract"[All Fields] OR "extract s"[All Fields] OR "extractabilities"[All Fields] OR "extractability"[All Fields] OR "extractable"[All Fields] OR "extractables"[All Fields] OR "extractant"[All Fields] OR "extractants"[All Fields] OR "extracted"[All Fields] OR "extractibility"[All Fields] OR "extractible"[All Fields] OR "extracting"[All Fields] OR "extraction"[All Fields] OR "extractions"[All Fields] OR "extractive"[All Fields] OR "extractives"[All Fields] OR "extracts"[All Fields])) OR ("gosha-jinki-gan"[Supplementary Concept] OR "gosha-jinki-gan"[All Fields] OR "goshajinkigan"[All Fields]) OR ("glutamin"[All Fields] OR "Glutamine"[MeSH Terms] OR "Glutamine"[All Fields] OR "glutamine s"[All Fields] OR "glutamines"[All Fields]) OR ("kampos"[All Fields] OR "medicine, kampo"[MeSH Terms] OR ("medicine"[All Fields] AND "kampo"[All Fields]) OR "kampo medicine"[All Fields] OR "kampo"[All Fields]) OR ("acetylcarnitine"[MeSH Terms] OR "acetylcarnitine"[All Fields] OR "acetyl l carnitine"[All Fields]) OR ("carnitin"[All Fields] OR "carnitine"[MeSH Terms] OR "carnitine"[All Fields] OR "carnitine s"[All Fields] OR "carnitines"[All Fields]) OR ("thioctic acid"[MeSH Terms] OR ("thioctic"[All Fields] AND "acid"[All Fields]) OR "thioctic acid"[All Fields] OR ("alpha"[All Fields] AND "lipoic"[All Fields] AND "acid"[All Fields]) OR "alpha lipoic acid"[All Fields]) OR ("fatty acids, omega 3"[MeSH Terms] OR ("fatty"[All Fields] AND "acids"[All Fields] AND "omega 3"[All Fields]) OR "omega-3 fatty acids"[All Fields] OR "omega 3"[All Fields]) OR ("probiotic s"[All Fields] OR "probiotal"[All Fields] OR "Probiotics"[MeSH Terms] OR "Probiotics"[All Fields] OR "probiotic"[All Fields]) OR ("Massage"[MeSH Terms] OR "Massage"[All Fields] OR "massages"[All Fields] OR "massaged"[All Fields] OR "massager"[All Fields] OR "massagers"[All Fields] OR "massaging"[All Fields]) OR ("manipulation, spinal"[MeSH Terms] OR ("manipulation"[All </p> |  |
|--|--|--------------------------------------------------------------------------------------------------------------------------------------------------------------------------------------------------------------------------------------------------------------------------------------------------------------------------------------------------------------------------------------------------------------------------------------------------------------------------------------------------------------------------------------------------------------------------------------------------------------------------------------------------------------------------------------------------------------------------------------------------------------------------------------------------------------------------------------------------------------------------------------------------------------------------------------------------------------------------------------------------------------------------------------------------------------------------------------------------------------------------------------------------------------------------------------------------------------------------------------------------------------------------------------------------------------------------------------------------------------------------------------------------------------------------------------------------------------------------------------------------------------------------------------------------------------------------------------------------------------------------------------------------------------------------------------------------------------------------------------------------------------------------------------------------------------------------------------------------------------------------------------------------------------------------------------------------------------------------------------------------------------------------------------------------------------------------------------------------------------------------------|--|

|  |                                                                                                                                                                                                                                                                                                                                                                                                                                                                                                                                                                                                                                                                                                                                                                                                                                                                                                                                                                                                                                                                                                                                                                                                                                                                                                                                                                                                                                                                                                                                                                                                                                                                                                                                                                                                                                                                                                                                                                                                                                                                                                 |  |
|--|-------------------------------------------------------------------------------------------------------------------------------------------------------------------------------------------------------------------------------------------------------------------------------------------------------------------------------------------------------------------------------------------------------------------------------------------------------------------------------------------------------------------------------------------------------------------------------------------------------------------------------------------------------------------------------------------------------------------------------------------------------------------------------------------------------------------------------------------------------------------------------------------------------------------------------------------------------------------------------------------------------------------------------------------------------------------------------------------------------------------------------------------------------------------------------------------------------------------------------------------------------------------------------------------------------------------------------------------------------------------------------------------------------------------------------------------------------------------------------------------------------------------------------------------------------------------------------------------------------------------------------------------------------------------------------------------------------------------------------------------------------------------------------------------------------------------------------------------------------------------------------------------------------------------------------------------------------------------------------------------------------------------------------------------------------------------------------------------------|--|
|  | <p>Fields] AND "spinal"[All Fields]) OR "spinal manipulation"[All Fields] OR ("spinal"[All Fields] AND "manipulation"[All Fields])) OR (("manual s"[All Fields] OR "manualization"[All Fields] OR "manualized"[All Fields] OR "manually"[All Fields] OR "manuals as topic"[MeSH Terms] OR ("manuals"[All Fields] AND "topic"[All Fields]) OR "manuals as topic"[All Fields] OR "manual"[All Fields] OR "manuals"[All Fields]) AND "therap*"[All Fields]) OR ("Hot Temperature"[MeSH Terms] OR ("hot"[All Fields] AND "temperature"[All Fields]) OR "Hot Temperature"[All Fields] OR "heat"[All Fields]) OR ("common cold"[MeSH Terms] OR ("common"[All Fields] AND "cold"[All Fields]) OR "common cold"[All Fields] OR "cold"[All Fields] OR "Cold Temperature"[MeSH Terms] OR ("cold"[All Fields] AND "temperature"[All Fields]) OR "Cold Temperature"[All Fields]) OR (("touch"[MeSH Terms] OR "touch"[All Fields] OR "touched"[All Fields] OR "touches"[All Fields] OR "touching"[All Fields] OR "touchings"[All Fields]) AND ("therapeutics"[MeSH Terms] OR "therapeutics"[All Fields] OR "therapies"[All Fields] OR "therapy"[MeSH Subheading] OR "therapy"[All Fields] OR "therapy s"[All Fields] OR "therapys"[All Fields])) OR ("mind-body"[All Fields] AND ("practicability"[All Fields] OR "practicable"[All Fields] OR "practical"[All Fields] OR "practicalities"[All Fields] OR "practicality"[All Fields] OR "practically"[All Fields] OR "practicals"[All Fields] OR "practice"[All Fields] OR "practice s"[All Fields] OR "practiced"[All Fields] OR "practices"[All Fields] OR "practicing"[All Fields])) OR ("Yoga"[MeSH Terms] OR "Yoga"[All Fields]) OR ("mediated"[All Fields] OR "mediational"[All Fields] OR "mediator"[All Fields] OR "mediator s"[All Fields] OR "mediators"[All Fields] OR "negotiating"[MeSH Terms] OR "negotiating"[All Fields] OR "mediate"[All Fields] OR "mediates"[All Fields] OR "mediating"[All Fields] OR "mediation"[All Fields] OR "mediations"[All Fields]) OR ("mind s"[All Fields] OR "minded"[All Fields] OR "mindful"[All Fields]</p> |  |
|--|-------------------------------------------------------------------------------------------------------------------------------------------------------------------------------------------------------------------------------------------------------------------------------------------------------------------------------------------------------------------------------------------------------------------------------------------------------------------------------------------------------------------------------------------------------------------------------------------------------------------------------------------------------------------------------------------------------------------------------------------------------------------------------------------------------------------------------------------------------------------------------------------------------------------------------------------------------------------------------------------------------------------------------------------------------------------------------------------------------------------------------------------------------------------------------------------------------------------------------------------------------------------------------------------------------------------------------------------------------------------------------------------------------------------------------------------------------------------------------------------------------------------------------------------------------------------------------------------------------------------------------------------------------------------------------------------------------------------------------------------------------------------------------------------------------------------------------------------------------------------------------------------------------------------------------------------------------------------------------------------------------------------------------------------------------------------------------------------------|--|

|  |  |                                                                                                                                                                                                                                                                                                                                                                                                                                                                                                                                                                                                                                                                                                                                                                                                                                                                                                                                                                                                                                                                                                                                                                                                                                                                                                                                                                                                                                                                                                                                                                                                                                                                                                                                                                                                                                                                                                                                                                                                                                                                                                |  |
|--|--|------------------------------------------------------------------------------------------------------------------------------------------------------------------------------------------------------------------------------------------------------------------------------------------------------------------------------------------------------------------------------------------------------------------------------------------------------------------------------------------------------------------------------------------------------------------------------------------------------------------------------------------------------------------------------------------------------------------------------------------------------------------------------------------------------------------------------------------------------------------------------------------------------------------------------------------------------------------------------------------------------------------------------------------------------------------------------------------------------------------------------------------------------------------------------------------------------------------------------------------------------------------------------------------------------------------------------------------------------------------------------------------------------------------------------------------------------------------------------------------------------------------------------------------------------------------------------------------------------------------------------------------------------------------------------------------------------------------------------------------------------------------------------------------------------------------------------------------------------------------------------------------------------------------------------------------------------------------------------------------------------------------------------------------------------------------------------------------------|--|
|  |  | <p>OR "Mindfulness"[MeSH Terms] OR "Mindfulness"[All Fields] OR "minding"[All Fields] OR "minds"[All Fields]) OR ("spiritual"[All Fields] OR "spiritualism"[MeSH Terms] OR "spiritualism"[All Fields] OR "spirituality"[MeSH Terms] OR "spirituality"[All Fields] OR "spiritualities"[All Fields] OR "spirituality s"[All Fields] OR "spiritually"[All Fields] OR "spirituals"[All Fields]) AND ("practicability"[All Fields] OR "practicable"[All Fields] OR "practical"[All Fields] OR "practicalities"[All Fields] OR "practicality"[All Fields] OR "practically"[All Fields] OR "practicals"[All Fields] OR "practice"[All Fields] OR "practice s"[All Fields] OR "practiced"[All Fields] OR "practices"[All Fields] OR "practicing"[All Fields])) OR ("psychotherapie"[All Fields] OR "Psychotherapy"[MeSH Terms] OR "Psychotherapy"[All Fields] OR "psychotherapies"[All Fields] OR "psychotherapy s"[All Fields]) OR ("breath"[All Fields] OR "breathe"[All Fields] OR "breathed"[All Fields] OR "breathes"[All Fields] OR "breathings"[All Fields] OR "breaths"[All Fields] OR "respiration"[MeSH Terms] OR "respiration"[All Fields] OR "breathing"[All Fields]) AND ("relaxation therapy"[MeSH Terms] OR ("relaxation"[All Fields] AND "therapy"[All Fields]) OR "relaxation therapy"[All Fields] OR ("relaxation"[All Fields] AND "techniques"[All Fields]) OR "relaxation techniques"[All Fields])) OR ("Movement"[MeSH Terms] OR "Movement"[All Fields] OR "movements"[All Fields] OR "movement s"[All Fields]) OR ("educability"[All Fields] OR "educable"[All Fields] OR "educates"[All Fields] OR "Education"[MeSH Subheading] OR "Education"[All Fields] OR "educational status"[MeSH Terms] OR ("educational"[All Fields] AND "status"[All Fields]) OR "educational status"[All Fields] OR "Education"[MeSH Terms] OR "education s"[All Fields] OR "educational"[All Fields] OR "educative"[All Fields] OR "educator"[All Fields] OR "educator s"[All Fields] OR "educators"[All Fields] OR "teaching"[MeSH Terms] OR "teaching"[All Fields] OR "educate"[All Fields] OR</p> |  |
|--|--|------------------------------------------------------------------------------------------------------------------------------------------------------------------------------------------------------------------------------------------------------------------------------------------------------------------------------------------------------------------------------------------------------------------------------------------------------------------------------------------------------------------------------------------------------------------------------------------------------------------------------------------------------------------------------------------------------------------------------------------------------------------------------------------------------------------------------------------------------------------------------------------------------------------------------------------------------------------------------------------------------------------------------------------------------------------------------------------------------------------------------------------------------------------------------------------------------------------------------------------------------------------------------------------------------------------------------------------------------------------------------------------------------------------------------------------------------------------------------------------------------------------------------------------------------------------------------------------------------------------------------------------------------------------------------------------------------------------------------------------------------------------------------------------------------------------------------------------------------------------------------------------------------------------------------------------------------------------------------------------------------------------------------------------------------------------------------------------------|--|

|  |  |                                                                                                                                                                                                                                                                                                                                                                                                                                                                                                                                                                                                                                                                                                                                                                                                                                                                                                                                                                                                                                                                                                                                                                                                                                                                                                                                                                                                                                                                                                                                                                                                                                                                                                                                                                                                                                                                                                                                                                                                                                                                                                                                                    |  |
|--|--|----------------------------------------------------------------------------------------------------------------------------------------------------------------------------------------------------------------------------------------------------------------------------------------------------------------------------------------------------------------------------------------------------------------------------------------------------------------------------------------------------------------------------------------------------------------------------------------------------------------------------------------------------------------------------------------------------------------------------------------------------------------------------------------------------------------------------------------------------------------------------------------------------------------------------------------------------------------------------------------------------------------------------------------------------------------------------------------------------------------------------------------------------------------------------------------------------------------------------------------------------------------------------------------------------------------------------------------------------------------------------------------------------------------------------------------------------------------------------------------------------------------------------------------------------------------------------------------------------------------------------------------------------------------------------------------------------------------------------------------------------------------------------------------------------------------------------------------------------------------------------------------------------------------------------------------------------------------------------------------------------------------------------------------------------------------------------------------------------------------------------------------------------|--|
|  |  | <p>"educated"[All Fields] OR "educating"[All Fields] OR "educations"[All Fields] OR ("Tai Ji"[MeSH Terms] OR ("tai"[All Fields] AND "ji"[All Fields]) OR "Tai Ji"[All Fields] OR ("tai"[All Fields] AND "chi"[All Fields]) OR "tai chi"[All Fields]) OR ("Art"[MeSH Terms] OR "Art"[All Fields]) OR ("Music"[MeSH Terms] OR "Music"[All Fields] OR "music s"[All Fields] OR "musical"[All Fields] OR "musicality"[All Fields] OR "musically"[All Fields] OR "musicals"[All Fields] OR "musics"[All Fields]) OR ("danced"[All Fields] OR "Dancing"[MeSH Terms] OR "Dancing"[All Fields] OR "dance"[All Fields] OR "dances"[All Fields]) OR ("acupunctural"[All Fields] OR "Acupuncture"[MeSH Terms] OR "Acupuncture"[All Fields] OR "Acupuncture Therapy"[MeSH Terms] OR ("Acupuncture"[All Fields] AND "therapy"[All Fields]) OR "Acupuncture Therapy"[All Fields] OR "acupuncture s"[All Fields] OR "acupunctured"[All Fields] OR "acupunctures"[All Fields] OR "acupuncturing"[All Fields]) OR ("Light"[MeSH Terms] OR "Light"[All Fields] OR "lighted"[All Fields] OR "lights"[All Fields] OR "lighting"[MeSH Terms] OR "lighting"[All Fields] OR "lightings"[All Fields] OR "lightness"[All Fields] OR "lightnesses"[All Fields]) AND ("stimulate"[All Fields] OR "stimulated"[All Fields] OR "stimulates"[All Fields] OR "stimulating"[All Fields] OR "stimulation"[All Fields] OR "stimulations"[All Fields] OR "stimulative"[All Fields] OR "stimulator"[All Fields] OR "stimulator s"[All Fields] OR "stimulators"[All Fields])) OR ("Electric Stimulation"[MeSH Terms] OR ("electric"[All Fields] AND "stimulation"[All Fields]) OR "Electric Stimulation"[All Fields] OR ("electrical"[All Fields] AND "stimulation"[All Fields]) OR "electrical stimulation"[All Fields]) OR (("magnet s"[All Fields] OR "magnetical"[All Fields] OR "magnetically"[All Fields] OR "magnetics"[MeSH Terms] OR "magnetics"[All Fields] OR "magnetic"[All Fields] OR "magnetisation"[All Fields] OR "magnetisations"[All Fields] OR "magnetised"[All Fields] OR "magnetism"[All Fields] OR "magnetisms"[All Fields] OR "magnetization"[All Fields] OR</p> |  |
|--|--|----------------------------------------------------------------------------------------------------------------------------------------------------------------------------------------------------------------------------------------------------------------------------------------------------------------------------------------------------------------------------------------------------------------------------------------------------------------------------------------------------------------------------------------------------------------------------------------------------------------------------------------------------------------------------------------------------------------------------------------------------------------------------------------------------------------------------------------------------------------------------------------------------------------------------------------------------------------------------------------------------------------------------------------------------------------------------------------------------------------------------------------------------------------------------------------------------------------------------------------------------------------------------------------------------------------------------------------------------------------------------------------------------------------------------------------------------------------------------------------------------------------------------------------------------------------------------------------------------------------------------------------------------------------------------------------------------------------------------------------------------------------------------------------------------------------------------------------------------------------------------------------------------------------------------------------------------------------------------------------------------------------------------------------------------------------------------------------------------------------------------------------------------|--|

|    |                                                                                                                                                                                                                                                                                                                  |                                                                                                                                                                                                                                                                                                                                                                                                                                                                                                                                                                                                                                                                                                                                                                                                                                                                                                                                                                                                                                                                                                                                                                                                                                                                                                                                                                                                                                                                                                                                                                                                      |           |
|----|------------------------------------------------------------------------------------------------------------------------------------------------------------------------------------------------------------------------------------------------------------------------------------------------------------------|------------------------------------------------------------------------------------------------------------------------------------------------------------------------------------------------------------------------------------------------------------------------------------------------------------------------------------------------------------------------------------------------------------------------------------------------------------------------------------------------------------------------------------------------------------------------------------------------------------------------------------------------------------------------------------------------------------------------------------------------------------------------------------------------------------------------------------------------------------------------------------------------------------------------------------------------------------------------------------------------------------------------------------------------------------------------------------------------------------------------------------------------------------------------------------------------------------------------------------------------------------------------------------------------------------------------------------------------------------------------------------------------------------------------------------------------------------------------------------------------------------------------------------------------------------------------------------------------------|-----------|
|    |                                                                                                                                                                                                                                                                                                                  | <p>"magnetizations"[All Fields] OR "magnetize"[All Fields] OR "magnetized"[All Fields] OR "magnetizing"[All Fields] OR "magnets"[MeSH Terms] OR "magnets"[All Fields] OR "magnet"[All Fields]) AND ("stimulate"[All Fields] OR "stimulated"[All Fields] OR "stimulates"[All Fields] OR "stimulating"[All Fields] OR "stimulation"[All Fields] OR "stimulations"[All Fields] OR "stimulative"[All Fields] OR "stimulator"[All Fields] OR "stimulator s"[All Fields] OR "stimulators"[All Fields]))))</p>                                                                                                                                                                                                                                                                                                                                                                                                                                                                                                                                                                                                                                                                                                                                                                                                                                                                                                                                                                                                                                                                                              |           |
| 63 | <p>#20 OR #21 OR #22 OR #23 OR #24 OR #25 OR #26 OR #27 OR #28 OR #29 OR #30 OR #31 OR #32 OR #33 OR #34 OR #35 OR #36 OR #37 OR #38 OR #39 OR #40 OR #41 OR #42 OR #43 OR #44 OR #45 OR #46 OR #47 OR #48 OR #49 OR #50 OR #51 OR #52 OR #53 OR #54 OR #55 OR #56 OR #57 OR #58 OR #59 OR #60 OR #61 OR #62</p> | <p>"complementaries"[All Fields] OR "complementary"[All Fields] OR ("life style"[MeSH Terms] OR ("life"[All Fields] AND "style"[All Fields]) OR "life style"[All Fields] OR "lifestyle"[All Fields] OR "lifestyles"[All Fields]) OR "lifetsyle"[All Fields] OR (("physical examination"[MeSH Terms] OR ("physical"[All Fields] AND "examination"[All Fields]) OR "physical examination"[All Fields] OR "physical"[All Fields] OR "physically"[All Fields] OR "physicals"[All Fields]) AND "activit*"[All Fields]) OR ("exercise"[MeSH Terms] OR "exercise"[All Fields] OR "exercises"[All Fields] OR "exercise therapy"[MeSH Terms] OR ("exercise"[All Fields] AND "therapy"[All Fields]) OR "exercise therapy"[All Fields] OR "exercising"[All Fields] OR "exercise s"[All Fields] OR "exercised"[All Fields] OR "exerciser"[All Fields] OR "exercisers"[All Fields]) OR ("nutrition s"[All Fields] OR "nutritional status"[MeSH Terms] OR ("nutritional"[All Fields] AND "status"[All Fields]) OR "nutritional status"[All Fields] OR "nutrition"[All Fields] OR "nutritional sciences"[MeSH Terms] OR ("nutritional"[All Fields] AND "sciences"[All Fields]) OR "nutritional sciences"[All Fields] OR "nutritional"[All Fields] OR "nutritional s"[All Fields] OR "nutritious"[All Fields] OR "nutritive"[All Fields]) OR ("diet"[MeSH Terms] OR "diet"[All Fields] OR ("diet"[MeSH Terms] OR "diet"[All Fields] OR "dietary"[All Fields] OR "dieteries"[All Fields]) AND "supplement*"[All Fields]) OR "antioxidant*"[All Fields] OR ("vitamin e"[MeSH Terms] OR "vitamin e"[All Fields]) OR</p> | 8,704,937 |

|  |  |                                                                                                                                                                                                                                                                                                                                                                                                                                                                                                                                                                                                                                                                                                                                                                                                                                                                                                                                                                                                                                                                                                                                                                                                                                                                                                                                                                                                                                                                                                                                                                                                                                                                                                                                                                                                                                                                                                                                                                                                                                                                                                                                   |  |
|--|--|-----------------------------------------------------------------------------------------------------------------------------------------------------------------------------------------------------------------------------------------------------------------------------------------------------------------------------------------------------------------------------------------------------------------------------------------------------------------------------------------------------------------------------------------------------------------------------------------------------------------------------------------------------------------------------------------------------------------------------------------------------------------------------------------------------------------------------------------------------------------------------------------------------------------------------------------------------------------------------------------------------------------------------------------------------------------------------------------------------------------------------------------------------------------------------------------------------------------------------------------------------------------------------------------------------------------------------------------------------------------------------------------------------------------------------------------------------------------------------------------------------------------------------------------------------------------------------------------------------------------------------------------------------------------------------------------------------------------------------------------------------------------------------------------------------------------------------------------------------------------------------------------------------------------------------------------------------------------------------------------------------------------------------------------------------------------------------------------------------------------------------------|--|
|  |  | <p>"herb*"[All Fields] OR (("herbal medicine"[MeSH Terms] OR ("herbal"[All Fields] AND "medicine"[All Fields]) OR "herbal medicine"[All Fields] OR "herbalism"[All Fields] OR "herbal"[All Fields] OR "herbals"[All Fields]) AND ("extract"[All Fields] OR "extract s"[All Fields] OR "extractabilities"[All Fields] OR "extractability"[All Fields] OR "extractable"[All Fields] OR "extractables"[All Fields] OR "extractant"[All Fields] OR "extractants"[All Fields] OR "extracted"[All Fields] OR "extractibility"[All Fields] OR "extractible"[All Fields] OR "extracting"[All Fields] OR "extraction"[All Fields] OR "extractions"[All Fields] OR "extractive"[All Fields] OR "extractives"[All Fields] OR "extracts"[All Fields])) OR ("gosha jinki gan"[Supplementary Concept] OR "gosha jinki gan"[All Fields] OR "goshajinkigan"[All Fields]) OR ("glutamin"[All Fields] OR "glutamine"[MeSH Terms] OR "glutamine"[All Fields] OR "glutamine s"[All Fields] OR "glutamines"[All Fields]) OR ("kampos"[All Fields] OR "medicine, kampo"[MeSH Terms] OR ("medicine"[All Fields] AND "kampo"[All Fields]) OR "kampo medicine"[All Fields] OR "kampo"[All Fields]) OR ("acetylcarnitine"[MeSH Terms] OR "acetylcarnitine"[All Fields] OR "acetyl l carnitine"[All Fields]) OR ("carnitin"[All Fields] OR "carnitine"[MeSH Terms] OR "carnitine"[All Fields] OR "carnitine s"[All Fields] OR "carnitines"[All Fields]) OR ("thioctic acid"[MeSH Terms] OR ("thioctic"[All Fields] AND "acid"[All Fields]) OR "thioctic acid"[All Fields] OR ("alpha"[All Fields] AND "lipoic"[All Fields] AND "acid"[All Fields]) OR "alpha lipoic acid"[All Fields]) OR ("fatty acids, omega 3"[MeSH Terms] OR ("fatty"[All Fields] AND "acids"[All Fields] AND "omega 3"[All Fields]) OR "omega-3 fatty acids"[All Fields] OR "omega 3"[All Fields]) OR ("probiotic s"[All Fields] OR "probiotal"[All Fields] OR "probiotics"[MeSH Terms] OR "probiotics"[All Fields] OR "probiotic"[All Fields]) OR ("massage"[MeSH Terms] OR "massage"[All Fields] OR "massages"[All Fields] OR "massaged"[All Fields] OR "massager"[All Fields] OR</p> |  |
|--|--|-----------------------------------------------------------------------------------------------------------------------------------------------------------------------------------------------------------------------------------------------------------------------------------------------------------------------------------------------------------------------------------------------------------------------------------------------------------------------------------------------------------------------------------------------------------------------------------------------------------------------------------------------------------------------------------------------------------------------------------------------------------------------------------------------------------------------------------------------------------------------------------------------------------------------------------------------------------------------------------------------------------------------------------------------------------------------------------------------------------------------------------------------------------------------------------------------------------------------------------------------------------------------------------------------------------------------------------------------------------------------------------------------------------------------------------------------------------------------------------------------------------------------------------------------------------------------------------------------------------------------------------------------------------------------------------------------------------------------------------------------------------------------------------------------------------------------------------------------------------------------------------------------------------------------------------------------------------------------------------------------------------------------------------------------------------------------------------------------------------------------------------|--|

|  |  |                                                                                                                                                                                                                                                                                                                                                                                                                                                                                                                                                                                                                                                                                                                                                                                                                                                                                                                                                                                                                                                                                                                                                                                                                                                                                                                                                                                                                                                                                                                                                                                                                                                                                                                                                                                                                                                                                                                                                                                                                                                                                    |  |
|--|--|------------------------------------------------------------------------------------------------------------------------------------------------------------------------------------------------------------------------------------------------------------------------------------------------------------------------------------------------------------------------------------------------------------------------------------------------------------------------------------------------------------------------------------------------------------------------------------------------------------------------------------------------------------------------------------------------------------------------------------------------------------------------------------------------------------------------------------------------------------------------------------------------------------------------------------------------------------------------------------------------------------------------------------------------------------------------------------------------------------------------------------------------------------------------------------------------------------------------------------------------------------------------------------------------------------------------------------------------------------------------------------------------------------------------------------------------------------------------------------------------------------------------------------------------------------------------------------------------------------------------------------------------------------------------------------------------------------------------------------------------------------------------------------------------------------------------------------------------------------------------------------------------------------------------------------------------------------------------------------------------------------------------------------------------------------------------------------|--|
|  |  | <p>"massagers"[All Fields] OR "massaging"[All Fields]) OR ("manipulation, spinal"[MeSH Terms] OR ("manipulation"[All Fields] AND "spinal"[All Fields]) OR "spinal manipulation"[All Fields] OR ("spinal"[All Fields] AND "manipulation"[All Fields])) OR (("manual s"[All Fields] OR "manualization"[All Fields] OR "manualized"[All Fields] OR "manually"[All Fields] OR "manuals as topic"[MeSH Terms] OR ("manuals"[All Fields] AND "topic"[All Fields]) OR "manuals as topic"[All Fields] OR "manual"[All Fields] OR "manuals"[All Fields]) AND "therap*"[All Fields]) OR ("hot temperature"[MeSH Terms] OR ("hot"[All Fields] AND "temperature"[All Fields]) OR "hot temperature"[All Fields] OR "heat"[All Fields]) OR ("common cold"[MeSH Terms] OR ("common"[All Fields] AND "cold"[All Fields]) OR "common cold"[All Fields] OR "cold"[All Fields] OR "cold temperature"[MeSH Terms] OR ("cold"[All Fields] AND "temperature"[All Fields]) OR "cold temperature"[All Fields]) OR (("touch"[MeSH Terms] OR "touch"[All Fields] OR "touched"[All Fields] OR "touches"[All Fields] OR "touching"[All Fields] OR "touchings"[All Fields]) AND ("therapeutics"[MeSH Terms] OR "therapeutics"[All Fields] OR "therapies"[All Fields] OR "therapy"[MeSH Subheading] OR "therapy"[All Fields] OR "therapy s"[All Fields] OR "therapys"[All Fields])) OR ("mind-body"[All Fields] AND ("practicability"[All Fields] OR "practicable"[All Fields] OR "practical"[All Fields] OR "practicalities"[All Fields] OR "practicality"[All Fields] OR "practically"[All Fields] OR "practicals"[All Fields] OR "practice"[All Fields] OR "practice s"[All Fields] OR "practiced"[All Fields] OR "practices"[All Fields] OR "practicing"[All Fields])) OR ("yoga"[MeSH Terms] OR "yoga"[All Fields]) OR ("mediated"[All Fields] OR "mediational"[All Fields] OR "mediator"[All Fields] OR "mediator s"[All Fields] OR "mediators"[All Fields] OR "negotiating"[MeSH Terms] OR "negotiating"[All Fields] OR "mediate"[All Fields] OR "mediates"[All Fields] OR "mediating"[All Fields] OR</p> |  |
|--|--|------------------------------------------------------------------------------------------------------------------------------------------------------------------------------------------------------------------------------------------------------------------------------------------------------------------------------------------------------------------------------------------------------------------------------------------------------------------------------------------------------------------------------------------------------------------------------------------------------------------------------------------------------------------------------------------------------------------------------------------------------------------------------------------------------------------------------------------------------------------------------------------------------------------------------------------------------------------------------------------------------------------------------------------------------------------------------------------------------------------------------------------------------------------------------------------------------------------------------------------------------------------------------------------------------------------------------------------------------------------------------------------------------------------------------------------------------------------------------------------------------------------------------------------------------------------------------------------------------------------------------------------------------------------------------------------------------------------------------------------------------------------------------------------------------------------------------------------------------------------------------------------------------------------------------------------------------------------------------------------------------------------------------------------------------------------------------------|--|

|  |  |                                                                                                                                                                                                                                                                                                                                                                                                                                                                                                                                                                                                                                                                                                                                                                                                                                                                                                                                                                                                                                                                                                                                                                                                                                                                                                                                                                                                                                                                                                                                                                                                                                                                                                                                                                                                                                                                                                                                                                                                                                                                                                                                                                    |  |
|--|--|--------------------------------------------------------------------------------------------------------------------------------------------------------------------------------------------------------------------------------------------------------------------------------------------------------------------------------------------------------------------------------------------------------------------------------------------------------------------------------------------------------------------------------------------------------------------------------------------------------------------------------------------------------------------------------------------------------------------------------------------------------------------------------------------------------------------------------------------------------------------------------------------------------------------------------------------------------------------------------------------------------------------------------------------------------------------------------------------------------------------------------------------------------------------------------------------------------------------------------------------------------------------------------------------------------------------------------------------------------------------------------------------------------------------------------------------------------------------------------------------------------------------------------------------------------------------------------------------------------------------------------------------------------------------------------------------------------------------------------------------------------------------------------------------------------------------------------------------------------------------------------------------------------------------------------------------------------------------------------------------------------------------------------------------------------------------------------------------------------------------------------------------------------------------|--|
|  |  | <p>"mediation"[All Fields] OR "mediations"[All Fields]) OR ("mind s"[All Fields] OR "minded"[All Fields] OR "mindful"[All Fields] OR "mindfulness"[MeSH Terms] OR "mindfulness"[All Fields] OR "minding"[All Fields] OR "minds"[All Fields]) OR (("spiritual"[All Fields] OR "spiritualism"[MeSH Terms] OR "spiritualism"[All Fields] OR "spirituality"[MeSH Terms] OR "spirituality"[All Fields] OR "spiritualities"[All Fields] OR "spirituality s"[All Fields] OR "spiritually"[All Fields] OR "spirituals"[All Fields]) AND ("practicability"[All Fields] OR "practicable"[All Fields] OR "practical"[All Fields] OR "practicalities"[All Fields] OR "practicality"[All Fields] OR "practically"[All Fields] OR "practicals"[All Fields] OR "practice"[All Fields] OR "practice s"[All Fields] OR "practiced"[All Fields] OR "practices"[All Fields] OR "practicing"[All Fields])) OR ("psychotherapie"[All Fields] OR "psychotherapy"[MeSH Terms] OR "psychotherapy"[All Fields] OR "psychotherapies"[All Fields] OR "psychotherapy s"[All Fields]) OR (("breath"[All Fields] OR "breathe"[All Fields] OR "breathed"[All Fields] OR "breathes"[All Fields] OR "breathings"[All Fields] OR "breaths"[All Fields] OR "respiration"[MeSH Terms] OR "respiration"[All Fields] OR "breathing"[All Fields]) AND ("relaxation therapy"[MeSH Terms] OR ("relaxation"[All Fields] AND "therapy"[All Fields]) OR "relaxation therapy"[All Fields] OR ("relaxation"[All Fields] AND "techniques"[All Fields]) OR "relaxation techniques"[All Fields])) OR ("movement"[MeSH Terms] OR "movement"[All Fields] OR "movements"[All Fields] OR "movement s"[All Fields]) OR ("educability"[All Fields] OR "educable"[All Fields] OR "educates"[All Fields] OR "education"[MeSH Subheading] OR "education"[All Fields] OR "educational status"[MeSH Terms] OR ("educational"[All Fields] AND "status"[All Fields]) OR "educational status"[All Fields] OR "education"[MeSH Terms] OR "education s"[All Fields] OR "educational"[All Fields] OR "educative"[All Fields] OR "educator"[All Fields] OR "educator s"[All Fields] OR "educators"[All Fields] OR "teaching"[MeSH</p> |  |
|--|--|--------------------------------------------------------------------------------------------------------------------------------------------------------------------------------------------------------------------------------------------------------------------------------------------------------------------------------------------------------------------------------------------------------------------------------------------------------------------------------------------------------------------------------------------------------------------------------------------------------------------------------------------------------------------------------------------------------------------------------------------------------------------------------------------------------------------------------------------------------------------------------------------------------------------------------------------------------------------------------------------------------------------------------------------------------------------------------------------------------------------------------------------------------------------------------------------------------------------------------------------------------------------------------------------------------------------------------------------------------------------------------------------------------------------------------------------------------------------------------------------------------------------------------------------------------------------------------------------------------------------------------------------------------------------------------------------------------------------------------------------------------------------------------------------------------------------------------------------------------------------------------------------------------------------------------------------------------------------------------------------------------------------------------------------------------------------------------------------------------------------------------------------------------------------|--|

|  |  |                                                                                                                                                                                                                                                                                                                                                                                                                                                                                                                                                                                                                                                                                                                                                                                                                                                                                                                                                                                                                                                                                                                                                                                                                                                                                                                                                                                                                                                                                                                                                                                                                                                                                                                                                                                                                                                                                                                                                                                                                                                                                                                                                      |  |
|--|--|------------------------------------------------------------------------------------------------------------------------------------------------------------------------------------------------------------------------------------------------------------------------------------------------------------------------------------------------------------------------------------------------------------------------------------------------------------------------------------------------------------------------------------------------------------------------------------------------------------------------------------------------------------------------------------------------------------------------------------------------------------------------------------------------------------------------------------------------------------------------------------------------------------------------------------------------------------------------------------------------------------------------------------------------------------------------------------------------------------------------------------------------------------------------------------------------------------------------------------------------------------------------------------------------------------------------------------------------------------------------------------------------------------------------------------------------------------------------------------------------------------------------------------------------------------------------------------------------------------------------------------------------------------------------------------------------------------------------------------------------------------------------------------------------------------------------------------------------------------------------------------------------------------------------------------------------------------------------------------------------------------------------------------------------------------------------------------------------------------------------------------------------------|--|
|  |  | <p>Terms] OR "teaching"[All Fields] OR "educate"[All Fields] OR "educated"[All Fields] OR "educating"[All Fields] OR "educations"[All Fields]) OR ("tai ji"[MeSH Terms] OR ("tai"[All Fields] AND "ji"[All Fields]) OR "tai ji"[All Fields] OR ("tai"[All Fields] AND "chi"[All Fields]) OR "tai chi"[All Fields] OR ("art"[MeSH Terms] OR "art"[All Fields]) OR ("music"[MeSH Terms] OR "music"[All Fields] OR "music s"[All Fields] OR "musical"[All Fields] OR "musicality"[All Fields] OR "musically"[All Fields] OR "musicals"[All Fields] OR "musics"[All Fields]) OR ("danced"[All Fields] OR "dancing"[MeSH Terms] OR "dancing"[All Fields] OR "dance"[All Fields] OR "dances"[All Fields]) OR ("acupunctural"[All Fields] OR "acupuncture"[MeSH Terms] OR "acupuncture"[All Fields] OR "acupuncture therapy"[MeSH Terms] OR ("acupuncture"[All Fields] AND "therapy"[All Fields]) OR "acupuncture therapy"[All Fields] OR "acupuncture s"[All Fields] OR "acupunctured"[All Fields] OR "acupunctures"[All Fields] OR "acupuncturing"[All Fields]) OR ("light"[MeSH Terms] OR "light"[All Fields] OR "lighted"[All Fields] OR "lights"[All Fields] OR "lighting"[MeSH Terms] OR "lighting"[All Fields] OR "lightings"[All Fields] OR "lightness"[All Fields] OR "lightnesses"[All Fields]) AND ("stimulate"[All Fields] OR "stimulated"[All Fields] OR "stimulates"[All Fields] OR "stimulating"[All Fields] OR "stimulation"[All Fields] OR "stimulations"[All Fields] OR "stimulative"[All Fields] OR "stimulator"[All Fields] OR "stimulator s"[All Fields] OR "stimulators"[All Fields])) OR ("electric stimulation"[MeSH Terms] OR ("electric"[All Fields] AND "stimulation"[All Fields]) OR "electric stimulation"[All Fields] OR ("electrical"[All Fields] AND "stimulation"[All Fields]) OR "electrical stimulation"[All Fields]) OR (("magnet s"[All Fields] OR "magnetical"[All Fields] OR "magnetically"[All Fields] OR "magnetics"[MeSH Terms] OR "magnetics"[All Fields] OR "magnetic"[All Fields] OR "magnetisation"[All Fields] OR "magnetisations"[All Fields] OR "magnetised"[All Fields] OR "magnetism"[All Fields] OR</p> |  |
|--|--|------------------------------------------------------------------------------------------------------------------------------------------------------------------------------------------------------------------------------------------------------------------------------------------------------------------------------------------------------------------------------------------------------------------------------------------------------------------------------------------------------------------------------------------------------------------------------------------------------------------------------------------------------------------------------------------------------------------------------------------------------------------------------------------------------------------------------------------------------------------------------------------------------------------------------------------------------------------------------------------------------------------------------------------------------------------------------------------------------------------------------------------------------------------------------------------------------------------------------------------------------------------------------------------------------------------------------------------------------------------------------------------------------------------------------------------------------------------------------------------------------------------------------------------------------------------------------------------------------------------------------------------------------------------------------------------------------------------------------------------------------------------------------------------------------------------------------------------------------------------------------------------------------------------------------------------------------------------------------------------------------------------------------------------------------------------------------------------------------------------------------------------------------|--|

|    |                        |                                                                                                                                                                                                                                                                                                                                                                                                                                                                                                                                                                                                                                                                                                                                                                                                                                                     |         |
|----|------------------------|-----------------------------------------------------------------------------------------------------------------------------------------------------------------------------------------------------------------------------------------------------------------------------------------------------------------------------------------------------------------------------------------------------------------------------------------------------------------------------------------------------------------------------------------------------------------------------------------------------------------------------------------------------------------------------------------------------------------------------------------------------------------------------------------------------------------------------------------------------|---------|
|    |                        | "magnetisms"[All Fields] OR "magnetization"[All Fields] OR "magnetizations"[All Fields] OR "magnetize"[All Fields] OR "magnetized"[All Fields] OR "magnetizing"[All Fields] OR "magnets"[MeSH Terms] OR "magnets"[All Fields] OR "magnet"[All Fields]) AND ("stimulate"[All Fields] OR "stimulated"[All Fields] OR "stimulates"[All Fields] OR "stimulating"[All Fields] OR "stimulation"[All Fields] OR "stimulations"[All Fields] OR "stimulative"[All Fields] OR "stimulator"[All Fields] OR "stimulator s"[All Fields] OR "stimulators"[All Fields]))                                                                                                                                                                                                                                                                                           |         |
| 62 | magnetic stimulation   | ("magnet s"[All Fields] OR "magnetical"[All Fields] OR "magnetically"[All Fields] OR "magnetics"[MeSH Terms] OR "magnetics"[All Fields] OR "magnetic"[All Fields] OR "magnetisation"[All Fields] OR "magnetisations"[All Fields] OR "magnetised"[All Fields] OR "magnetism"[All Fields] OR "magnetisms"[All Fields] OR "magnetization"[All Fields] OR "magnetizations"[All Fields] OR "magnetize"[All Fields] OR "magnetized"[All Fields] OR "magnetizing"[All Fields] OR "magnets"[MeSH Terms] OR "magnets"[All Fields] OR "magnet"[All Fields]) AND ("stimulate"[All Fields] OR "stimulated"[All Fields] OR "stimulates"[All Fields] OR "stimulating"[All Fields] OR "stimulation"[All Fields] OR "stimulations"[All Fields] OR "stimulative"[All Fields] OR "stimulator"[All Fields] OR "stimulator s"[All Fields] OR "stimulators"[All Fields]) | 66,364  |
| 61 | electrical stimulation | "electric stimulation"[MeSH Terms] OR ("electric"[All Fields] AND "stimulation"[All Fields]) OR "electric stimulation"[All Fields] OR ("electrical"[All Fields] AND "stimulation"[All Fields]) OR "electrical stimulation"[All Fields]                                                                                                                                                                                                                                                                                                                                                                                                                                                                                                                                                                                                              | 203,507 |
| 60 | light stimulation      | ("light"[MeSH Terms] OR "light"[All Fields] OR "lighted"[All Fields] OR "lights"[All Fields] OR "lighting"[MeSH Terms] OR "lighting"[All Fields] OR "lightings"[All Fields] OR "lightness"[All Fields] OR "lightnesses"[All Fields]) AND ("stimulate"[All Fields]                                                                                                                                                                                                                                                                                                                                                                                                                                                                                                                                                                                   | 62,447  |

|    |             |                                                                                                                                                                                                                                                                                                                                                                                                                                                                                                                                                                                                                                         |           |
|----|-------------|-----------------------------------------------------------------------------------------------------------------------------------------------------------------------------------------------------------------------------------------------------------------------------------------------------------------------------------------------------------------------------------------------------------------------------------------------------------------------------------------------------------------------------------------------------------------------------------------------------------------------------------------|-----------|
|    |             | OR "stimulated"[All Fields] OR "stimulates"[All Fields] OR "stimulating"[All Fields] OR "stimulation"[All Fields] OR "stimulations"[All Fields] OR "stimulative"[All Fields] OR "stimulator"[All Fields] OR "stimulator s"[All Fields] OR "stimulators"[All Fields])                                                                                                                                                                                                                                                                                                                                                                    |           |
| 59 | acupuncture | "acupunctural"[All Fields] OR "acupuncture"[MeSH Terms] OR "acupuncture"[All Fields] OR "acupuncture therapy"[MeSH Terms] OR ("acupuncture"[All Fields] AND "therapy"[All Fields]) OR "acupuncture therapy"[All Fields] OR "acupuncture s"[All Fields] OR "acupunctured"[All Fields] OR "acupunctures"[All Fields] OR "acupuncturing"[All Fields]                                                                                                                                                                                                                                                                                       | 47,266    |
| 58 | dance       | "danced"[All Fields] OR "dancing"[MeSH Terms] OR "dancing"[All Fields] OR "dance"[All Fields] OR "dances"[All Fields]                                                                                                                                                                                                                                                                                                                                                                                                                                                                                                                   | 11,921    |
| 57 | music       | "music"[MeSH Terms] OR "music"[All Fields] OR "music s"[All Fields] OR "musical"[All Fields] OR "musicality"[All Fields] OR "musically"[All Fields] OR "musicals"[All Fields] OR "musics"[All Fields]                                                                                                                                                                                                                                                                                                                                                                                                                                   | 39,162    |
| 56 | art         | "art"[MeSH Terms] OR "art"[All Fields]                                                                                                                                                                                                                                                                                                                                                                                                                                                                                                                                                                                                  | 228,764   |
| 55 | tai chi     | "tai ji"[MeSH Terms] OR ("tai"[All Fields] AND "ji"[All Fields]) OR "tai ji"[All Fields] OR ("tai"[All Fields] AND "chi"[All Fields]) OR "tai chi"[All Fields]                                                                                                                                                                                                                                                                                                                                                                                                                                                                          | 4,691     |
| 54 | education   | "educability"[All Fields] OR "educable"[All Fields] OR "educates"[All Fields] OR "education"[MeSH Subheading] OR "education"[All Fields] OR "educational status"[MeSH Terms] OR ("educational"[All Fields] AND "status"[All Fields]) OR "educational status"[All Fields] OR "education"[MeSH Terms] OR "education s"[All Fields] OR "educational"[All Fields] OR "educative"[All Fields] OR "educator"[All Fields] OR "educator s"[All Fields] OR "educators"[All Fields] OR "teaching"[MeSH Terms] OR "teaching"[All Fields] OR "educate"[All Fields] OR "educated"[All Fields] OR "educating"[All Fields] OR "educations"[All Fields] | 2,600,675 |

|    |                                     |                                                                                                                                                                                                                                                                                                                                                                                                                                                                                                                                                                                                                                      |           |
|----|-------------------------------------|--------------------------------------------------------------------------------------------------------------------------------------------------------------------------------------------------------------------------------------------------------------------------------------------------------------------------------------------------------------------------------------------------------------------------------------------------------------------------------------------------------------------------------------------------------------------------------------------------------------------------------------|-----------|
| 53 | movement                            | "movement"[MeSH Terms] OR "movement"[All Fields] OR "movements"[All Fields] OR "movement s"[All Fields]                                                                                                                                                                                                                                                                                                                                                                                                                                                                                                                              | 1,071,705 |
| 52 | breathing and relaxation techniques | ("breath"[All Fields] OR "breathe"[All Fields] OR "breathed"[All Fields] OR "breathes"[All Fields] OR "breathings"[All Fields] OR "breaths"[All Fields] OR "respiration"[MeSH Terms] OR "respiration"[All Fields] OR "breathing"[All Fields]) AND ("relaxation therapy"[MeSH Terms] OR ("relaxation"[All Fields] AND "therapy"[All Fields]) OR "relaxation therapy"[All Fields] OR ("relaxation"[All Fields] AND "techniques"[All Fields]) OR "relaxation techniques"[All Fields])                                                                                                                                                   | 2,265     |
| 51 | psychotherapy                       | "psychotherapie"[All Fields] OR "psychotherapy"[MeSH Terms] OR "psychotherapy"[All Fields] OR "psychotherapies"[All Fields] OR "psychotherapy s"[All Fields]                                                                                                                                                                                                                                                                                                                                                                                                                                                                         | 288,358   |
| 50 | spiritual practices                 | ("spiritual"[All Fields] OR "spiritualism"[MeSH Terms] OR "spiritualism"[All Fields] OR "spirituality"[MeSH Terms] OR "spirituality"[All Fields] OR "spiritualities"[All Fields] OR "spirituality s"[All Fields] OR "spiritually"[All Fields] OR "spirituals"[All Fields]) AND ("practicability"[All Fields] OR "practicable"[All Fields] OR "practical"[All Fields] OR "practicalities"[All Fields] OR "practicality"[All Fields] OR "practically"[All Fields] OR "practicals"[All Fields] OR "practice"[All Fields] OR "practice s"[All Fields] OR "practiced"[All Fields] OR "practices"[All Fields] OR "practicing"[All Fields]) | 8,399     |
| 49 | mindfulness                         | "mind s"[All Fields] OR "minded"[All Fields] OR "mindful"[All Fields] OR "mindfulness"[MeSH Terms] OR "mindfulness"[All Fields] OR "minding"[All Fields] OR "minds"[All Fields]                                                                                                                                                                                                                                                                                                                                                                                                                                                      | 31,597    |
| 48 | mediation                           | "mediated"[All Fields] OR "mediational"[All Fields] OR "mediator"[All Fields] OR "mediator s"[All Fields] OR "mediators"[All Fields] OR "negotiating"[MeSH Terms] OR "negotiating"[All Fields] OR "mediate"[All Fields] OR "mediates"[All Fields] OR "mediating"[All Fields] OR "mediation"[All Fields] OR "mediations"[All Fields]                                                                                                                                                                                                                                                                                                  | 1,763,057 |

|    |                     |                                                                                                                                                                                                                                                                                                                                                                                   |         |
|----|---------------------|-----------------------------------------------------------------------------------------------------------------------------------------------------------------------------------------------------------------------------------------------------------------------------------------------------------------------------------------------------------------------------------|---------|
| 47 | yoga                | "yoga"[MeSH Terms] OR "yoga"[All Fields]                                                                                                                                                                                                                                                                                                                                          | 8,945   |
| 46 | mind-body practice  | "mind-body"[All Fields] AND ("practicability"[All Fields] OR "practicable"[All Fields] OR "practical"[All Fields] OR "practicalities"[All Fields] OR "practicality"[All Fields] OR "practically"[All Fields] OR "practicals"[All Fields] OR "practice"[All Fields] OR "practice s"[All Fields] OR "practiced"[All Fields] OR "practices"[All Fields] OR "practicing"[All Fields]) | 2,185   |
| 45 | touch therapy       | ("touch"[MeSH Terms] OR "touch"[All Fields] OR "touched"[All Fields] OR "touches"[All Fields] OR "touching"[All Fields] OR "touchings"[All Fields]) AND ("therapeutics"[MeSH Terms] OR "therapeutics"[All Fields] OR "therapies"[All Fields] OR "therapy"[MeSH Subheading] OR "therapy"[All Fields] OR "therapy s"[All Fields] OR "therapys"[All Fields])                         | 17,773  |
| 44 | cold                | "common cold"[MeSH Terms] OR ("common"[All Fields] AND "cold"[All Fields]) OR "common cold"[All Fields] OR "cold"[All Fields] OR "cold temperature"[MeSH Terms] OR ("cold"[All Fields] AND "temperature"[All Fields]) OR "cold temperature"[All Fields]                                                                                                                           | 229,546 |
| 43 | heat                | "hot temperature"[MeSH Terms] OR ("hot"[All Fields] AND "temperature"[All Fields]) OR "hot temperature"[All Fields] OR "heat"[All Fields]                                                                                                                                                                                                                                         | 392,108 |
| 42 | manual therap*      | ("manual s"[All Fields] OR "manualization"[All Fields] OR "manualized"[All Fields] OR "manually"[All Fields] OR "manuals as topic"[MeSH Terms] OR ("manuals"[All Fields] AND "topic"[All Fields]) OR "manuals as topic"[All Fields] OR "manual"[All Fields] OR "manuals"[All Fields]) AND "therap*"[All Fields]                                                                   | 47,078  |
| 41 | spinal manipulation | "manipulation, spinal"[MeSH Terms] OR ("manipulation"[All Fields] AND "spinal"[All Fields]) OR "spinal manipulation"[All Fields] OR ("spinal"[All Fields] AND "manipulation"[All Fields])                                                                                                                                                                                         | 5,765   |
| 40 | massage             | "massage"[MeSH Terms] OR "massage"[All Fields] OR "massages"[All Fields] OR "massaged"[All Fields] OR                                                                                                                                                                                                                                                                             | 19,842  |

|    |                    |                                                                                                                                                                                                                                                                                                                                                                                                                                                                                                             |        |
|----|--------------------|-------------------------------------------------------------------------------------------------------------------------------------------------------------------------------------------------------------------------------------------------------------------------------------------------------------------------------------------------------------------------------------------------------------------------------------------------------------------------------------------------------------|--------|
|    |                    | "massager"[All Fields] OR "massagers"[All Fields] OR "massaging"[All Fields]                                                                                                                                                                                                                                                                                                                                                                                                                                |        |
| 39 | probiotics         | "probiotic s"[All Fields] OR "probiotal"[All Fields] OR "probiotics"[MeSH Terms] OR "probiotics"[All Fields] OR "probiotic"[All Fields]                                                                                                                                                                                                                                                                                                                                                                     | 53,129 |
| 38 | omega-3            | "fatty acids, omega 3"[MeSH Terms] OR ("fatty"[All Fields] AND "acids"[All Fields] AND "omega 3"[All Fields]) OR "omega-3 fatty acids"[All Fields] OR "omega 3"[All Fields]                                                                                                                                                                                                                                                                                                                                 | 40,383 |
| 37 | alpha-lipoic acid  | "thioctic acid"[MeSH Terms] OR ("thioctic"[All Fields] AND "acid"[All Fields]) OR "thioctic acid"[All Fields] OR ("alpha"[All Fields] AND "lipoic"[All Fields] AND "acid"[All Fields]) OR "alpha lipoic acid"[All Fields]                                                                                                                                                                                                                                                                                   | 6,411  |
| 36 | carnitine          | "carnitin"[All Fields] OR "carnitine"[MeSH Terms] OR "carnitine"[All Fields] OR "carnitine s"[All Fields] OR "carnitines"[All Fields]                                                                                                                                                                                                                                                                                                                                                                       | 22,183 |
| 35 | acetyl-L-carnitine | "acetylcarnitine"[MeSH Terms] OR "acetylcarnitine"[All Fields] OR "acetyl l carnitine"[All Fields]                                                                                                                                                                                                                                                                                                                                                                                                          | 2,452  |
| 34 | kampo              | "kampos"[All Fields] OR "medicine, kampo"[MeSH Terms] OR ("medicine"[All Fields] AND "kampo"[All Fields]) OR "kampo medicine"[All Fields] OR "kampo"[All Fields]                                                                                                                                                                                                                                                                                                                                            | 2,431  |
| 33 | glutamine          | "glutamin"[All Fields] OR "glutamine"[MeSH Terms] OR "glutamine"[All Fields] OR "glutamine s"[All Fields] OR "glutamines"[All Fields]                                                                                                                                                                                                                                                                                                                                                                       | 55,471 |
| 32 | goshajinkigan      | "gosha jinki gan"[Supplementary Concept] OR "gosha jinki gan"[All Fields] OR "goshajinkigan"[All Fields]                                                                                                                                                                                                                                                                                                                                                                                                    | 133    |
| 31 | herbal extract     | ("herbal medicine"[MeSH Terms] OR ("herbal"[All Fields] AND "medicine"[All Fields]) OR "herbal medicine"[All Fields] OR "herbalism"[All Fields] OR "herbal"[All Fields] OR "herbals"[All Fields]) AND ("extract"[All Fields] OR "extract s"[All Fields] OR "extractabilities"[All Fields] OR "extractability"[All Fields] OR "extractable"[All Fields] OR "extractables"[All Fields] OR "extractant"[All Fields] OR "extractants"[All Fields] OR "extracted"[All Fields] OR "extractibility"[All Fields] OR | 35,594 |

|    |                            |                                                                                                                                                                                                                                                                                                                                                                                                                                             |         |
|----|----------------------------|---------------------------------------------------------------------------------------------------------------------------------------------------------------------------------------------------------------------------------------------------------------------------------------------------------------------------------------------------------------------------------------------------------------------------------------------|---------|
|    |                            | "extractible"[All Fields] OR "extracting"[All Fields] OR "extraction"[All Fields] OR "extractions"[All Fields] OR "extractive"[All Fields] OR "extractives"[All Fields] OR "extracts"[All Fields])                                                                                                                                                                                                                                          |         |
| 30 | herb*                      | "herb*"[All Fields]                                                                                                                                                                                                                                                                                                                                                                                                                         | 261,499 |
| 29 | vitamin E                  | "vitamin e"[MeSH Terms] OR "vitamin e"[All Fields]                                                                                                                                                                                                                                                                                                                                                                                          | 48,782  |
| 28 | antioxidant*               | "antioxidant*"[All Fields]                                                                                                                                                                                                                                                                                                                                                                                                                  | 368,437 |
| 27 | dietary supplement*        | ("diet"[MeSH Terms] OR "diet"[All Fields] OR "dietary"[All Fields] OR "dieteries"[All Fields]) AND "supplement*"[All Fields]                                                                                                                                                                                                                                                                                                                | 164,804 |
| 26 | diet                       | "diet"[MeSH Terms] OR "diet"[All Fields]                                                                                                                                                                                                                                                                                                                                                                                                    | 664,214 |
| 25 | nutrition                  | "nutrition s"[All Fields] OR "nutritional status"[MeSH Terms] OR ("nutritional"[All Fields] AND "status"[All Fields]) OR "nutritional status"[All Fields] OR "nutrition"[All Fields] OR "nutritional sciences"[MeSH Terms] OR ("nutritional"[All Fields] AND "sciences"[All Fields]) OR "nutritional sciences"[All Fields] OR "nutritional"[All Fields] OR "nutritional"[All Fields] OR "nutritions"[All Fields] OR "nutritive"[All Fields] | 878,405 |
| 24 | exercise                   | "exercise"[MeSH Terms] OR "exercise"[All Fields] OR "exercises"[All Fields] OR "exercise therapy"[MeSH Terms] OR ("exercise"[All Fields] AND "therapy"[All Fields]) OR "exercise therapy"[All Fields] OR "exercising"[All Fields] OR "exercise s"[All Fields] OR "exercised"[All Fields] OR "exerciser"[All Fields] OR "exercisers"[All Fields]                                                                                             | 621,123 |
| 23 | physical activit*          | ("physical examination"[MeSH Terms] OR ("physical"[All Fields] AND "examination"[All Fields]) OR "physical examination"[All Fields] OR "physical"[All Fields] OR "physically"[All Fields] OR "physicals"[All Fields]) AND "activit*"[All Fields]                                                                                                                                                                                            | 511,834 |
| 22 | lifetsyle - Spellcheck off | "lifetsyle"[All Fields]                                                                                                                                                                                                                                                                                                                                                                                                                     | 3       |
| 21 | lifestyle                  | "life style"[MeSH Terms] OR ("life"[All Fields] AND "style"[All Fields]) OR "life style"[All Fields] OR "lifestyle"[All Fields] OR "lifestyles"[All Fields]                                                                                                                                                                                                                                                                                 | 252,182 |
| 20 | complementary              | "complementaries"[All Fields] OR "complementary"[All Fields]                                                                                                                                                                                                                                                                                                                                                                                | 272,215 |

|    |                                                                                                                                                                                                                                                                                                                                                                                                                                                                                                                                                                                                                                                                                                                                                                                                                                                                                                                                                                                                                                                                                                                              |                                                                                                                                                                                                                                                                                                                                                                                                                                                                                                                                                                                                                                                                                                                                                                                                                                                                                                                                                                                                                                                                                                                                                                                                                |           |
|----|------------------------------------------------------------------------------------------------------------------------------------------------------------------------------------------------------------------------------------------------------------------------------------------------------------------------------------------------------------------------------------------------------------------------------------------------------------------------------------------------------------------------------------------------------------------------------------------------------------------------------------------------------------------------------------------------------------------------------------------------------------------------------------------------------------------------------------------------------------------------------------------------------------------------------------------------------------------------------------------------------------------------------------------------------------------------------------------------------------------------------|----------------------------------------------------------------------------------------------------------------------------------------------------------------------------------------------------------------------------------------------------------------------------------------------------------------------------------------------------------------------------------------------------------------------------------------------------------------------------------------------------------------------------------------------------------------------------------------------------------------------------------------------------------------------------------------------------------------------------------------------------------------------------------------------------------------------------------------------------------------------------------------------------------------------------------------------------------------------------------------------------------------------------------------------------------------------------------------------------------------------------------------------------------------------------------------------------------------|-----------|
| 19 | <p>((((((((((((((((((((((((("Complementary Therapies"[Mesh]) OR ( "Life Style"[Mesh] OR "Healthy Lifestyle"[Mesh] )) OR "Exercise"[Mesh]) OR "Diet"[Mesh]) OR "Dietary Supplements"[Mesh]) OR "Antioxidants"[Mesh]) OR "Vitamin E"[Mesh]) OR "Plant Extracts"[Mesh]) OR "gosha-jinki-gan" [Supplementary Concept]) OR "Glutamine"[Mesh]) OR "Medicine, Kampo"[Mesh]) OR "Fatty Acids, Omega-3"[Mesh]) OR "Probiotics"[Mesh]) OR "Massage"[Mesh]) OR "Manipulation, Spinal"[Mesh]) OR "Musculoskeletal Manipulations"[Mesh]) OR "Hot Temperature"[Mesh]) OR "Cold Temperature"[Mesh]) OR "Yoga"[Mesh]) OR ( "Mindfulness"[Mesh] OR "Mindfulness-Based Cognitive Therapy"[Mesh] )) OR ( "Psychotherapy"[Mesh] OR "Psychotherapy, Psychodynamic"[Mesh] )) OR "Movement"[Mesh]) OR "Education"[Mesh]) OR "Tai Ji"[Mesh]) OR ( "Art"[Mesh] OR "Art Therapy"[Mesh] )) OR ( "Music"[Mesh] OR "Music Therapy"[Mesh] )) OR ( "Dancing"[Mesh] OR "Dance Therapy"[Mesh] )) OR ( "Acupuncture"[Mesh] OR "Acupuncture Therapy"[Mesh] )) OR "Light"[Mesh]) OR ( "Electric Stimulation"[Mesh] OR "Electric Stimulation Therapy"[Mesh] )</p> | <p>"Complementary Therapies"[MeSH Terms] OR "Life Style"[MeSH Terms] OR "Healthy Lifestyle"[MeSH Terms] OR "Exercise"[MeSH Terms] OR "Diet"[MeSH Terms] OR "Dietary Supplements"[MeSH Terms] OR "Antioxidants"[MeSH Terms] OR "Vitamin E"[MeSH Terms] OR "Plant Extracts"[MeSH Terms] OR "gosha-jinki-gan"[Supplementary Concept] OR "Glutamine"[MeSH Terms] OR "medicine, kampo"[MeSH Terms] OR "fatty acids, omega 3"[MeSH Terms] OR "Probiotics"[MeSH Terms] OR "Massage"[MeSH Terms] OR "manipulation, spinal"[MeSH Terms] OR "Musculoskeletal Manipulations"[MeSH Terms] OR "Hot Temperature"[MeSH Terms] OR "Cold Temperature"[MeSH Terms] OR "Yoga"[MeSH Terms] OR "Mindfulness"[MeSH Terms] OR "Psychotherapy"[MeSH Terms] OR "psychotherapy, psychodynamic"[MeSH Terms] OR "Movement"[MeSH Terms] OR "Education"[MeSH Terms] OR "Tai Ji"[MeSH Terms] OR "Art"[MeSH Terms] OR "Art Therapy"[MeSH Terms] OR "Music"[MeSH Terms] OR "Music Therapy"[MeSH Terms] OR "Dancing"[MeSH Terms] OR "Dance Therapy"[MeSH Terms] OR "Acupuncture"[MeSH Terms] OR "Acupuncture Therapy"[MeSH Terms] OR "Light"[MeSH Terms] OR "Electric Stimulation"[MeSH Terms] OR "Electric Stimulation Therapy"[MeSH Terms]</p> | 3,544,599 |
| 18 | #9 AND #17                                                                                                                                                                                                                                                                                                                                                                                                                                                                                                                                                                                                                                                                                                                                                                                                                                                                                                                                                                                                                                                                                                                   | <p>("Neoplasms"[MeSH Terms] OR "cancer*"[All Fields] OR "tumor*"[All Fields] OR "neoplasm*"[All Fields] OR "malignanc*"[All Fields]) AND ("Colon"[MeSH Terms] OR</p>                                                                                                                                                                                                                                                                                                                                                                                                                                                                                                                                                                                                                                                                                                                                                                                                                                                                                                                                                                                                                                           | 457,159   |

|    |                                                                 |                                                                                                                                                                                                                                                                                                                                                                                                                                                                                                                                                                                                                                                                                                                                                                                                                                                                                                                                                                                                                                                                                                                                                          |           |
|----|-----------------------------------------------------------------|----------------------------------------------------------------------------------------------------------------------------------------------------------------------------------------------------------------------------------------------------------------------------------------------------------------------------------------------------------------------------------------------------------------------------------------------------------------------------------------------------------------------------------------------------------------------------------------------------------------------------------------------------------------------------------------------------------------------------------------------------------------------------------------------------------------------------------------------------------------------------------------------------------------------------------------------------------------------------------------------------------------------------------------------------------------------------------------------------------------------------------------------------------|-----------|
|    |                                                                 | <p>"Rectum"[MeSH Terms] OR ("Intestines"[MeSH Terms] OR "Lower Gastrointestinal Tract"[MeSH Terms]) OR "colorectal"[All Fields] OR ("Colon"[MeSH Terms] OR "Colon"[All Fields] OR "colonic"[All Fields] OR "colons"[All Fields] OR "colon s"[All Fields] OR "colonal"[All Fields] OR "colonically"[All Fields] OR "colonitis"[All Fields]) OR ("Rectum"[MeSH Terms] OR "Rectum"[All Fields] OR "rectums"[All Fields]) OR ("bowel s"[All Fields] OR "bowell"[All Fields] OR "Intestines"[MeSH Terms] OR "Intestines"[All Fields] OR "bowel"[All Fields] OR "bowels"[All Fields]) OR (("lower"[All Fields] OR "lowered"[All Fields] OR "lowering"[All Fields] OR "lowerings"[All Fields] OR "lowers"[All Fields]) AND ("gastrointestinal"[All Fields] OR "gastrointestinally"[All Fields] OR "gastrointestine"[All Fields])) OR (("lower"[All Fields] OR "lowered"[All Fields] OR "lowering"[All Fields] OR "lowerings"[All Fields] OR "lowers"[All Fields]) AND "gastrointetinal"[All Fields]) OR (("lower"[All Fields] OR "lowered"[All Fields] OR "lowering"[All Fields] OR "lowerings"[All Fields] OR "lowers"[All Fields]) AND "GI"[All Fields]))</p> |           |
| 17 | #2 OR #3 OR #4 OR #10 OR #11 OR #12 OR #13 OR #14 OR #15 OR #16 | <p>"Colon"[MeSH Terms] OR "Rectum"[MeSH Terms] OR ("Intestines"[MeSH Terms] OR "Lower Gastrointestinal Tract"[MeSH Terms]) OR "colorectal"[All Fields] OR ("Colon"[MeSH Terms] OR "Colon"[All Fields] OR "colonic"[All Fields] OR "colons"[All Fields] OR "colon s"[All Fields] OR "colonal"[All Fields] OR "colonically"[All Fields] OR "colonitis"[All Fields]) OR ("Rectum"[MeSH Terms] OR "Rectum"[All Fields] OR "rectums"[All Fields]) OR ("bowel s"[All Fields] OR "bowell"[All Fields] OR "Intestines"[MeSH Terms] OR "Intestines"[All Fields] OR "bowel"[All Fields] OR "bowels"[All Fields]) OR (("lower"[All Fields] OR "lowered"[All Fields] OR "lowering"[All Fields] OR "lowerings"[All Fields] OR "lowers"[All Fields]) AND ("gastrointestinal"[All Fields] OR "gastrointestinally"[All Fields] OR "gastrointestine"[All Fields])) OR (("lower"[All Fields] OR "lowered"[All Fields] OR "lowering"[All Fields] OR "lowerings"[All Fields] OR "lowers"[All Fields]) AND "GI"[All Fields]))</p>                                                                                                                                             | 1,013,352 |

|    |                                        |                                                                                                                                                                                                                                                                    |           |
|----|----------------------------------------|--------------------------------------------------------------------------------------------------------------------------------------------------------------------------------------------------------------------------------------------------------------------|-----------|
|    |                                        | "lowering"[All Fields] OR "lowerings"[All Fields] OR "lowers"[All Fields]) AND "gastrointetinal"[All Fields]) OR ("lower"[All Fields] OR "lowered"[All Fields] OR "lowering"[All Fields] OR "lowerings"[All Fields] OR "lowers"[All Fields]) AND "GI"[All Fields]) |           |
| 16 | lower GI                               | ("lower"[All Fields] OR "lowered"[All Fields] OR "lowering"[All Fields] OR "lowerings"[All Fields] OR "lowers"[All Fields]) AND "GI"[All Fields]                                                                                                                   | 10,633    |
| 15 | lower gastrointetinal - Spellcheck off | ("lower"[All Fields] OR "lowered"[All Fields] OR "lowering"[All Fields] OR "lowerings"[All Fields] OR "lowers"[All Fields]) AND "gastrointetinal"[All Fields]                                                                                                      | 0         |
| 14 | lower gastrointestinal                 | ("lower"[All Fields] OR "lowered"[All Fields] OR "lowering"[All Fields] OR "lowerings"[All Fields] OR "lowers"[All Fields]) AND ("gastrointestinal"[All Fields] OR "gastrointestinally"[All Fields] OR "gastrointestine"[All Fields])                              | 58,221    |
| 13 | bowel                                  | "bowel s"[All Fields] OR "bowell"[All Fields] OR "intestines"[MeSH Terms] OR "intestines"[All Fields] OR "bowel"[All Fields] OR "bowels"[All Fields]                                                                                                               | 596,479   |
| 12 | rectum                                 | "rectum"[MeSH Terms] OR "rectum"[All Fields] OR "rectums"[All Fields]                                                                                                                                                                                              | 88,046    |
| 11 | colon                                  | "colon"[MeSH Terms] OR "colon"[All Fields] OR "colonic"[All Fields] OR "colons"[All Fields] OR "colon s"[All Fields] OR "colonal"[All Fields] OR "colonically"[All Fields] OR "colonitis"[All Fields]                                                              | 332,768   |
| 10 | colorectal                             | "colorectal"[All Fields]                                                                                                                                                                                                                                           | 252,459   |
| 9  | #1 OR #5 OR #6 OR #7 OR #8             | "Neoplasms"[MeSH Terms] OR "cancer*"[All Fields] OR "tumor*"[All Fields] OR "neoplasm*"[All Fields] OR "malignanc*"[All Fields]                                                                                                                                    | 5,875,971 |
| 8  | malignanc*                             | "malignanc*"[All Fields]                                                                                                                                                                                                                                           | 348,388   |
| 7  | neoplasm*                              | "neoplasm*"[All Fields]                                                                                                                                                                                                                                            | 3,465,083 |
| 6  | tumor*                                 | "tumor*"[All Fields]                                                                                                                                                                                                                                               | 2,537,494 |
| 5  | cancer*                                | "cancer*"[All Fields]                                                                                                                                                                                                                                              | 3,298,479 |

|   |                                                              |                                                                        |           |
|---|--------------------------------------------------------------|------------------------------------------------------------------------|-----------|
| 4 | ("Intestines"[Mesh]) OR "Lower Gastrointestinal Tract"[Mesh] | "Intestines"[MeSH Terms] OR "Lower Gastrointestinal Tract"[MeSH Terms] | 428,342   |
| 3 | "Rectum"[Mesh]                                               | "Rectum"[MeSH Terms]                                                   | 44,541    |
| 2 | "Colon"[Mesh]                                                | "Colon"[MeSH Terms]                                                    | 77,281    |
| 1 | "Neoplasms"[Mesh]                                            | "Neoplasms"[MeSH Terms]                                                | 4,061,569 |

**Medline (n=293)**

| <b>Search Number</b> | <b>Search details</b>                                                                                                                                                                                                                                                                                                                                                                     | <b>Results</b> |
|----------------------|-------------------------------------------------------------------------------------------------------------------------------------------------------------------------------------------------------------------------------------------------------------------------------------------------------------------------------------------------------------------------------------------|----------------|
| 1                    | exp Neoplasms/                                                                                                                                                                                                                                                                                                                                                                            | 4062498        |
| 2                    | cancer*.mp. [mp=title, book title, abstract, original title, name of substance word, subject heading word, floating sub-heading word, keyword heading word, organism supplementary concept word, protocol supplementary concept word, rare disease supplementary concept word, unique identifier, synonyms, population supplementary concept word, anatomy supplementary concept word]    | 2104886        |
| 3                    | tumor*.mp. [mp=title, book title, abstract, original title, name of substance word, subject heading word, floating sub-heading word, keyword heading word, organism supplementary concept word, protocol supplementary concept word, rare disease supplementary concept word, unique identifier, synonyms, population supplementary concept word, anatomy supplementary concept word]     | 2187694        |
| 4                    | neoplasm*.mp. [mp=title, book title, abstract, original title, name of substance word, subject heading word, floating sub-heading word, keyword heading word, organism supplementary concept word, protocol supplementary concept word, rare disease supplementary concept word, unique identifier, synonyms, population supplementary concept word, anatomy supplementary concept word]  | 3422492        |
| 5                    | malignanc*.mp. [mp=title, book title, abstract, original title, name of substance word, subject heading word, floating sub-heading word, keyword heading word, organism supplementary concept word, protocol supplementary concept word, rare disease supplementary concept word, unique identifier, synonyms, population supplementary concept word, anatomy supplementary concept word] | 275721         |
| 6                    | 1 or 2 or 3 or 4 or 5                                                                                                                                                                                                                                                                                                                                                                     | 4900149        |
| 7                    | exp Colon, Descending/ or exp Colon, Transverse/ or exp Colon/ or exp Colon, Ascending/ or exp Colon, Sigmoid/                                                                                                                                                                                                                                                                            | 77274          |
| 8                    | exp Rectum/                                                                                                                                                                                                                                                                                                                                                                               | 44538          |
| 9                    | colorectal.mp. [mp=title, book title, abstract, original title, name of substance word, subject heading word, floating sub-heading word, keyword heading word, organism supplementary concept word, protocol supplementary concept word, rare disease supplementary concept word, unique identifier, synonyms, population supplementary concept word, anatomy supplementary concept word] | 190228         |
| 10                   | colon.mp. [mp=title, book title, abstract, original title, name of substance word, subject heading word, floating sub-heading word, keyword heading word, organism supplementary concept word, protocol supplementary concept word, rare disease supplementary concept word, unique identifier, synonyms, population supplementary concept word, anatomy supplementary concept word]      | 217458         |

|    |                                                                                                                                                                                                                                                                                                                                                                                                       |        |
|----|-------------------------------------------------------------------------------------------------------------------------------------------------------------------------------------------------------------------------------------------------------------------------------------------------------------------------------------------------------------------------------------------------------|--------|
| 11 | rectum.mp. [mp=title, book title, abstract, original title, name of substance word, subject heading word, floating sub-heading word, keyword heading word, organism supplementary concept word, protocol supplementary concept word, rare disease supplementary concept word, unique identifier, synonyms, population supplementary concept word, anatomy supplementary concept word]                 | 70976  |
| 12 | bowel.mp. [mp=title, book title, abstract, original title, name of substance word, subject heading word, floating sub-heading word, keyword heading word, organism supplementary concept word, protocol supplementary concept word, rare disease supplementary concept word, unique identifier, synonyms, population supplementary concept word, anatomy supplementary concept word]                  | 173837 |
| 13 | lower gastrointestinal.mp. [mp=title, book title, abstract, original title, name of substance word, subject heading word, floating sub-heading word, keyword heading word, organism supplementary concept word, protocol supplementary concept word, rare disease supplementary concept word, unique identifier, synonyms, population supplementary concept word, anatomy supplementary concept word] | 4421   |
| 14 | lower GI.mp. [mp=title, book title, abstract, original title, name of substance word, subject heading word, floating sub-heading word, keyword heading word, organism supplementary concept word, protocol supplementary concept word, rare disease supplementary concept word, unique identifier, synonyms, population supplementary concept word, anatomy supplementary concept word]               | 1272   |
| 15 | 7 or 8 or 9 or 10 or 11 or 12 or 13 or 14                                                                                                                                                                                                                                                                                                                                                             | 547378 |
| 16 | 6 and 15                                                                                                                                                                                                                                                                                                                                                                                              | 315507 |
| 17 | exp Complementary Therapies/                                                                                                                                                                                                                                                                                                                                                                          | 256617 |
| 18 | exp Life Style/ or exp Healthy Lifestyle/                                                                                                                                                                                                                                                                                                                                                             | 116824 |
| 19 | exp Exercise/                                                                                                                                                                                                                                                                                                                                                                                         | 266500 |
| 20 | exp Enteral Nutrition/                                                                                                                                                                                                                                                                                                                                                                                | 22753  |
| 21 | exp Diet/                                                                                                                                                                                                                                                                                                                                                                                             | 348724 |
| 22 | exp Dietary Supplements/                                                                                                                                                                                                                                                                                                                                                                              | 111257 |
| 23 | exp Antioxidants/                                                                                                                                                                                                                                                                                                                                                                                     | 562717 |
| 24 | exp Vitamin E/ or exp Vitamins/                                                                                                                                                                                                                                                                                                                                                                       | 364132 |
| 25 | exp Drugs, Chinese Herbal/ or exp Plant Extracts/                                                                                                                                                                                                                                                                                                                                                     | 223817 |
| 26 | exp Glutamine/                                                                                                                                                                                                                                                                                                                                                                                        | 20443  |
| 27 | exp Medicine, Kampo/                                                                                                                                                                                                                                                                                                                                                                                  | 799    |
| 28 | exp Acetylcarnitine/                                                                                                                                                                                                                                                                                                                                                                                  | 1372   |

|    |                                                                                                                                                                                                                                                                                                                                                                                              |         |
|----|----------------------------------------------------------------------------------------------------------------------------------------------------------------------------------------------------------------------------------------------------------------------------------------------------------------------------------------------------------------------------------------------|---------|
| 29 | exp Carnitine/                                                                                                                                                                                                                                                                                                                                                                               | 11155   |
| 30 | exp Fatty Acids, Omega-3/                                                                                                                                                                                                                                                                                                                                                                    | 30822   |
| 31 | exp Probiotics/                                                                                                                                                                                                                                                                                                                                                                              | 28149   |
| 32 | exp Massage/                                                                                                                                                                                                                                                                                                                                                                                 | 7236    |
| 33 | exp Manipulation, Spinal/                                                                                                                                                                                                                                                                                                                                                                    | 1897    |
| 34 | exp Musculoskeletal Manipulations/                                                                                                                                                                                                                                                                                                                                                           | 19467   |
| 35 | exp Hot Temperature/                                                                                                                                                                                                                                                                                                                                                                         | 129377  |
| 36 | exp Cold Temperature/                                                                                                                                                                                                                                                                                                                                                                        | 82039   |
| 37 | exp Therapeutic Touch/                                                                                                                                                                                                                                                                                                                                                                       | 1016    |
| 38 | exp Mind-Body Therapies/                                                                                                                                                                                                                                                                                                                                                                     | 49589   |
| 39 | exp Yoga/                                                                                                                                                                                                                                                                                                                                                                                    | 4232    |
| 40 | exp Meditation/                                                                                                                                                                                                                                                                                                                                                                              | 4127    |
| 41 | exp Mindfulness/                                                                                                                                                                                                                                                                                                                                                                             | 7916    |
| 42 | exp Psychotherapy/ or exp Psychotherapy, Psychodynamic/ or exp Imagery, Psychotherapy/ or exp Psychotherapy, Group/ or exp Psychotherapy, Brief/                                                                                                                                                                                                                                             | 228734  |
| 43 | exp Movement/                                                                                                                                                                                                                                                                                                                                                                                | 688264  |
| 44 | exp Education/                                                                                                                                                                                                                                                                                                                                                                               | 936893  |
| 45 | exp Tai Ji/                                                                                                                                                                                                                                                                                                                                                                                  | 1629    |
| 46 | exp Art Therapy/ or exp Art/ or exp Sensory Art Therapies/                                                                                                                                                                                                                                                                                                                                   | 95986   |
| 47 | exp Music Therapy/ or exp Music/                                                                                                                                                                                                                                                                                                                                                             | 21358   |
| 48 | exp Dancing/                                                                                                                                                                                                                                                                                                                                                                                 | 3774    |
| 49 | exp Acupuncture/ or exp Acupuncture Therapy/                                                                                                                                                                                                                                                                                                                                                 | 32061   |
| 50 | exp Electric Stimulation/                                                                                                                                                                                                                                                                                                                                                                    | 131046  |
| 51 | 17 or 18 or 19 or 20 or 21 or 22 or 23 or 24 or 25 or 26 or 27 or 28 or 29 or 30 or 31 or 32 or 33 or 34 or 35 or 36 or 37 or 38 or 39 or 40 or 41 or 42 or 43 or 44 or 45 or 46 or 47 or 48 or 49 or 50                                                                                                                                                                                     | 3745745 |
| 52 | Complementary.mp. [mp=title, book title, abstract, original title, name of substance word, subject heading word, floating sub-heading word, keyword heading word, organism supplementary concept word, protocol supplementary concept word, rare disease supplementary concept word, unique identifier, synonyms, population supplementary concept word, anatomy supplementary concept word] | 230918  |

|    |                                                                                                                                                                                                                                                                                                                                                                                                    |        |
|----|----------------------------------------------------------------------------------------------------------------------------------------------------------------------------------------------------------------------------------------------------------------------------------------------------------------------------------------------------------------------------------------------------|--------|
| 53 | lifestyle.mp. [mp=title, book title, abstract, original title, name of substance word, subject heading word, floating sub-heading word, keyword heading word, organism supplementary concept word, protocol supplementary concept word, rare disease supplementary concept word, unique identifier, synonyms, population supplementary concept word, anatomy supplementary concept word]           | 117724 |
| 54 | physical activit*.mp. [mp=title, book title, abstract, original title, name of substance word, subject heading word, floating sub-heading word, keyword heading word, organism supplementary concept word, protocol supplementary concept word, rare disease supplementary concept word, unique identifier, synonyms, population supplementary concept word, anatomy supplementary concept word]   | 143697 |
| 55 | exercise.mp. [mp=title, book title, abstract, original title, name of substance word, subject heading word, floating sub-heading word, keyword heading word, organism supplementary concept word, protocol supplementary concept word, rare disease supplementary concept word, unique identifier, synonyms, population supplementary concept word, anatomy supplementary concept word]            | 410741 |
| 56 | nutrition.mp. [mp=title, book title, abstract, original title, name of substance word, subject heading word, floating sub-heading word, keyword heading word, organism supplementary concept word, protocol supplementary concept word, rare disease supplementary concept word, unique identifier, synonyms, population supplementary concept word, anatomy supplementary concept word]           | 269721 |
| 57 | diet.mp. [mp=title, book title, abstract, original title, name of substance word, subject heading word, floating sub-heading word, keyword heading word, organism supplementary concept word, protocol supplementary concept word, rare disease supplementary concept word, unique identifier, synonyms, population supplementary concept word, anatomy supplementary concept word]                | 533739 |
| 58 | dietary supplement*.mp. [mp=title, book title, abstract, original title, name of substance word, subject heading word, floating sub-heading word, keyword heading word, organism supplementary concept word, protocol supplementary concept word, rare disease supplementary concept word, unique identifier, synonyms, population supplementary concept word, anatomy supplementary concept word] | 92586  |
| 59 | antioxidant*.mp. [mp=title, book title, abstract, original title, name of substance word, subject heading word, floating sub-heading word, keyword heading word, organism supplementary concept word, protocol supplementary concept word, rare disease supplementary concept word, unique identifier, synonyms, population supplementary concept word, anatomy supplementary concept word]        | 289611 |
| 60 | vitamin E.mp. [mp=title, book title, abstract, original title, name of substance word, subject heading word, floating sub-heading word, keyword heading word, organism supplementary concept word, protocol supplementary concept word, rare disease supplementary concept word, unique identifier, synonyms, population supplementary concept word, anatomy supplementary concept word]           | 40056  |

|    |                                                                                                                                                                                                                                                                                                                                                                                                   |        |
|----|---------------------------------------------------------------------------------------------------------------------------------------------------------------------------------------------------------------------------------------------------------------------------------------------------------------------------------------------------------------------------------------------------|--------|
| 61 | herb*.mp. [mp=title, book title, abstract, original title, name of substance word, subject heading word, floating sub-heading word, keyword heading word, organism supplementary concept word, protocol supplementary concept word, rare disease supplementary concept word, unique identifier, synonyms, population supplementary concept word, anatomy supplementary concept word]              | 168873 |
| 62 | herbal extract.mp. [mp=title, book title, abstract, original title, name of substance word, subject heading word, floating sub-heading word, keyword heading word, organism supplementary concept word, protocol supplementary concept word, rare disease supplementary concept word, unique identifier, synonyms, population supplementary concept word, anatomy supplementary concept word]     | 870    |
| 63 | goshajinkigan.mp. [mp=title, book title, abstract, original title, name of substance word, subject heading word, floating sub-heading word, keyword heading word, organism supplementary concept word, protocol supplementary concept word, rare disease supplementary concept word, unique identifier, synonyms, population supplementary concept word, anatomy supplementary concept word]      | 57     |
| 64 | glutamine.mp. [mp=title, book title, abstract, original title, name of substance word, subject heading word, floating sub-heading word, keyword heading word, organism supplementary concept word, protocol supplementary concept word, rare disease supplementary concept word, unique identifier, synonyms, population supplementary concept word, anatomy supplementary concept word]          | 49137  |
| 65 | kampo.mp. [mp=title, book title, abstract, original title, name of substance word, subject heading word, floating sub-heading word, keyword heading word, organism supplementary concept word, protocol supplementary concept word, rare disease supplementary concept word, unique identifier, synonyms, population supplementary concept word, anatomy supplementary concept word]              | 1507   |
| 66 | acetyl-L-carnitine.mp. [mp=title, book title, abstract, original title, name of substance word, subject heading word, floating sub-heading word, keyword heading word, organism supplementary concept word, protocol supplementary concept word, rare disease supplementary concept word, unique identifier, synonyms, population supplementary concept word, anatomy supplementary concept word] | 993    |
| 67 | carnitine.mp. [mp=title, book title, abstract, original title, name of substance word, subject heading word, floating sub-heading word, keyword heading word, organism supplementary concept word, protocol supplementary concept word, rare disease supplementary concept word, unique identifier, synonyms, population supplementary concept word, anatomy supplementary concept word]          | 19211  |
| 68 | alpha-lipoic acid.mp. [mp=title, book title, abstract, original title, name of substance word, subject heading word, floating sub-heading word, keyword heading word, organism supplementary concept word, protocol supplementary concept word, rare disease supplementary concept word, unique identifier, synonyms, population supplementary concept word, anatomy supplementary concept word]  | 3056   |

|    |                                                                                                                                                                                                                                                                                                                                                                                                    |        |
|----|----------------------------------------------------------------------------------------------------------------------------------------------------------------------------------------------------------------------------------------------------------------------------------------------------------------------------------------------------------------------------------------------------|--------|
| 69 | omega-3.mp. [mp=title, book title, abstract, original title, name of substance word, subject heading word, floating sub-heading word, keyword heading word, organism supplementary concept word, protocol supplementary concept word, rare disease supplementary concept word, unique identifier, synonyms, population supplementary concept word, anatomy supplementary concept word]             | 25540  |
| 70 | probiotics.mp. [mp=title, book title, abstract, original title, name of substance word, subject heading word, floating sub-heading word, keyword heading word, organism supplementary concept word, protocol supplementary concept word, rare disease supplementary concept word, unique identifier, synonyms, population supplementary concept word, anatomy supplementary concept word]          | 34176  |
| 71 | massage.mp. [mp=title, book title, abstract, original title, name of substance word, subject heading word, floating sub-heading word, keyword heading word, organism supplementary concept word, protocol supplementary concept word, rare disease supplementary concept word, unique identifier, synonyms, population supplementary concept word, anatomy supplementary concept word]             | 15514  |
| 72 | spinal manipulation.mp. [mp=title, book title, abstract, original title, name of substance word, subject heading word, floating sub-heading word, keyword heading word, organism supplementary concept word, protocol supplementary concept word, rare disease supplementary concept word, unique identifier, synonyms, population supplementary concept word, anatomy supplementary concept word] | 1332   |
| 73 | manual therap*.mp. [mp=title, book title, abstract, original title, name of substance word, subject heading word, floating sub-heading word, keyword heading word, organism supplementary concept word, protocol supplementary concept word, rare disease supplementary concept word, unique identifier, synonyms, population supplementary concept word, anatomy supplementary concept word]      | 3074   |
| 74 | heat.mp. [mp=title, book title, abstract, original title, name of substance word, subject heading word, floating sub-heading word, keyword heading word, organism supplementary concept word, protocol supplementary concept word, rare disease supplementary concept word, unique identifier, synonyms, population supplementary concept word, anatomy supplementary concept word]                | 235349 |
| 75 | cold.mp. [mp=title, book title, abstract, original title, name of substance word, subject heading word, floating sub-heading word, keyword heading word, organism supplementary concept word, protocol supplementary concept word, rare disease supplementary concept word, unique identifier, synonyms, population supplementary concept word, anatomy supplementary concept word]                | 154541 |
| 76 | touch therapy.mp. [mp=title, book title, abstract, original title, name of substance word, subject heading word, floating sub-heading word, keyword heading word, organism supplementary concept word, protocol supplementary concept word, rare disease supplementary concept word, unique identifier, synonyms, population supplementary concept word, anatomy supplementary concept word]       | 57     |

|    |                                                                                                                                                                                                                                                                                                                                                                                                                      |        |
|----|----------------------------------------------------------------------------------------------------------------------------------------------------------------------------------------------------------------------------------------------------------------------------------------------------------------------------------------------------------------------------------------------------------------------|--------|
| 77 | mind-body practice.mp. [mp=title, book title, abstract, original title, name of substance word, subject heading word, floating sub-heading word, keyword heading word, organism supplementary concept word, protocol supplementary concept word, rare disease supplementary concept word, unique identifier, synonyms, population supplementary concept word, anatomy supplementary concept word]                    | 86     |
| 78 | yoga.mp. [mp=title, book title, abstract, original title, name of substance word, subject heading word, floating sub-heading word, keyword heading word, organism supplementary concept word, protocol supplementary concept word, rare disease supplementary concept word, unique identifier, synonyms, population supplementary concept word, anatomy supplementary concept word]                                  | 5847   |
| 79 | mediation.mp. [mp=title, book title, abstract, original title, name of substance word, subject heading word, floating sub-heading word, keyword heading word, organism supplementary concept word, protocol supplementary concept word, rare disease supplementary concept word, unique identifier, synonyms, population supplementary concept word, anatomy supplementary concept word]                             | 44324  |
| 80 | mindfulness.mp. [mp=title, book title, abstract, original title, name of substance word, subject heading word, floating sub-heading word, keyword heading word, organism supplementary concept word, protocol supplementary concept word, rare disease supplementary concept word, unique identifier, synonyms, population supplementary concept word, anatomy supplementary concept word]                           | 11742  |
| 81 | spiritual practices.mp. [mp=title, book title, abstract, original title, name of substance word, subject heading word, floating sub-heading word, keyword heading word, organism supplementary concept word, protocol supplementary concept word, rare disease supplementary concept word, unique identifier, synonyms, population supplementary concept word, anatomy supplementary concept word]                   | 335    |
| 82 | psychotherapy.mp. [mp=title, book title, abstract, original title, name of substance word, subject heading word, floating sub-heading word, keyword heading word, organism supplementary concept word, protocol supplementary concept word, rare disease supplementary concept word, unique identifier, synonyms, population supplementary concept word, anatomy supplementary concept word]                         | 91071  |
| 83 | (breathing and relaxation techniques).mp. [mp=title, book title, abstract, original title, name of substance word, subject heading word, floating sub-heading word, keyword heading word, organism supplementary concept word, protocol supplementary concept word, rare disease supplementary concept word, unique identifier, synonyms, population supplementary concept word, anatomy supplementary concept word] | 116    |
| 84 | movement.mp. [mp=title, book title, abstract, original title, name of substance word, subject heading word, floating sub-heading word, keyword heading word, organism supplementary concept word, protocol supplementary concept word, rare disease supplementary concept word, unique identifier, synonyms, population supplementary concept word, anatomy supplementary concept word]                              | 467410 |

|    |                                                                                                                                                                                                                                                                                                                                                                                                       |         |
|----|-------------------------------------------------------------------------------------------------------------------------------------------------------------------------------------------------------------------------------------------------------------------------------------------------------------------------------------------------------------------------------------------------------|---------|
| 85 | education.mp. [mp=title, book title, abstract, original title, name of substance word, subject heading word, floating sub-heading word, keyword heading word, organism supplementary concept word, protocol supplementary concept word, rare disease supplementary concept word, unique identifier, synonyms, population supplementary concept word, anatomy supplementary concept word]              | 1023916 |
| 86 | tai chi.mp. [mp=title, book title, abstract, original title, name of substance word, subject heading word, floating sub-heading word, keyword heading word, organism supplementary concept word, protocol supplementary concept word, rare disease supplementary concept word, unique identifier, synonyms, population supplementary concept word, anatomy supplementary concept word]                | 2084    |
| 87 | art.mp. [mp=title, book title, abstract, original title, name of substance word, subject heading word, floating sub-heading word, keyword heading word, organism supplementary concept word, protocol supplementary concept word, rare disease supplementary concept word, unique identifier, synonyms, population supplementary concept word, anatomy supplementary concept word]                    | 130538  |
| 88 | music.mp. [mp=title, book title, abstract, original title, name of substance word, subject heading word, floating sub-heading word, keyword heading word, organism supplementary concept word, protocol supplementary concept word, rare disease supplementary concept word, unique identifier, synonyms, population supplementary concept word, anatomy supplementary concept word]                  | 26922   |
| 89 | dance.mp. [mp=title, book title, abstract, original title, name of substance word, subject heading word, floating sub-heading word, keyword heading word, organism supplementary concept word, protocol supplementary concept word, rare disease supplementary concept word, unique identifier, synonyms, population supplementary concept word, anatomy supplementary concept word]                  | 5108    |
| 90 | acupuncture.mp. [mp=title, book title, abstract, original title, name of substance word, subject heading word, floating sub-heading word, keyword heading word, organism supplementary concept word, protocol supplementary concept word, rare disease supplementary concept word, unique identifier, synonyms, population supplementary concept word, anatomy supplementary concept word]            | 32141   |
| 91 | light stimulation.mp. [mp=title, book title, abstract, original title, name of substance word, subject heading word, floating sub-heading word, keyword heading word, organism supplementary concept word, protocol supplementary concept word, rare disease supplementary concept word, unique identifier, synonyms, population supplementary concept word, anatomy supplementary concept word]      | 2031    |
| 92 | electrical stimulation.mp. [mp=title, book title, abstract, original title, name of substance word, subject heading word, floating sub-heading word, keyword heading word, organism supplementary concept word, protocol supplementary concept word, rare disease supplementary concept word, unique identifier, synonyms, population supplementary concept word, anatomy supplementary concept word] | 47849   |

|     |                                                                                                                                                                                                                                                                                                                                                                                                                           |         |
|-----|---------------------------------------------------------------------------------------------------------------------------------------------------------------------------------------------------------------------------------------------------------------------------------------------------------------------------------------------------------------------------------------------------------------------------|---------|
| 93  | magnetic stimulation.mp. [mp=title, book title, abstract, original title, name of substance word, subject heading word, floating sub-heading word, keyword heading word, organism supplementary concept word, protocol supplementary concept word, rare disease supplementary concept word, unique identifier, synonyms, population supplementary concept word, anatomy supplementary concept word]                       | 22004   |
| 94  | 51 or 52 or 53 or 54 or 55 or 56 or 57 or 58 or 59 or 60 or 61 or 62 or 63 or 64 or 65 or 66 or 67 or 68 or 69 or 70 or 71 or 72 or 73 or 74 or 75 or 76 or 77 or 78 or 79 or 80 or 81 or 82 or 83 or 84 or 85 or 86 or 87 or 88 or 89 or 90 or 91 or 92 or 93                                                                                                                                                            | 5542244 |
| 95  | exp Peripheral Nervous System Diseases/                                                                                                                                                                                                                                                                                                                                                                                   | 173498  |
| 96  | peripheral neuropathy.mp. [mp=title, book title, abstract, original title, name of substance word, subject heading word, floating sub-heading word, keyword heading word, organism supplementary concept word, protocol supplementary concept word, rare disease supplementary concept word, unique identifier, synonyms, population supplementary concept word, anatomy supplementary concept word]                      | 21147   |
| 97  | 95 or 96                                                                                                                                                                                                                                                                                                                                                                                                                  | 181523  |
| 98  | exp Oxaliplatin/                                                                                                                                                                                                                                                                                                                                                                                                          | 8925    |
| 99  | chemotherapy.mp. [mp=title, book title, abstract, original title, name of substance word, subject heading word, floating sub-heading word, keyword heading word, organism supplementary concept word, protocol supplementary concept word, rare disease supplementary concept word, unique identifier, synonyms, population supplementary concept word, anatomy supplementary concept word]                               | 499285  |
| 100 | oxaliplatin.mp. [mp=title, book title, abstract, original title, name of substance word, subject heading word, floating sub-heading word, keyword heading word, organism supplementary concept word, protocol supplementary concept word, rare disease supplementary concept word, unique identifier, synonyms, population supplementary concept word, anatomy supplementary concept word]                                | 13911   |
| 101 | 98 or 99 or 100                                                                                                                                                                                                                                                                                                                                                                                                           | 502444  |
| 102 | 97 and 101                                                                                                                                                                                                                                                                                                                                                                                                                | 6466    |
| 103 | chemotherapy-induced peripheral neuropathy.mp. [mp=title, book title, abstract, original title, name of substance word, subject heading word, floating sub-heading word, keyword heading word, organism supplementary concept word, protocol supplementary concept word, rare disease supplementary concept word, unique identifier, synonyms, population supplementary concept word, anatomy supplementary concept word] | 1494    |
| 104 | oxaliplatin-induced peripheral neuropathy.mp. [mp=title, book title, abstract, original title, name of substance word, subject heading word, floating sub-heading word, keyword heading word, organism supplementary concept word, protocol supplementary concept word, rare disease supplementary concept word, unique identifier, synonyms, population supplementary concept word, anatomy supplementary concept word]  | 191     |

|     |                                                                                                                                                                                                                                                                                                                                                                                       |      |
|-----|---------------------------------------------------------------------------------------------------------------------------------------------------------------------------------------------------------------------------------------------------------------------------------------------------------------------------------------------------------------------------------------|------|
| 105 | CIPN.mp. [mp=title, book title, abstract, original title, name of substance word, subject heading word, floating sub-heading word, keyword heading word, organism supplementary concept word, protocol supplementary concept word, rare disease supplementary concept word, unique identifier, synonyms, population supplementary concept word, anatomy supplementary concept word]   | 1156 |
| 106 | OIPN.mp. [mp=title, book title, abstract, original title, name of substance word, subject heading word, floating sub-heading word, keyword heading word, organism supplementary concept word, protocol supplementary concept word, rare disease supplementary concept word, unique identifier, synonyms, population supplementary concept word, anatomy supplementary concept word]   | 82   |
| 107 | OXAIPN.mp. [mp=title, book title, abstract, original title, name of substance word, subject heading word, floating sub-heading word, keyword heading word, organism supplementary concept word, protocol supplementary concept word, rare disease supplementary concept word, unique identifier, synonyms, population supplementary concept word, anatomy supplementary concept word] | 15   |
| 108 | 102 or 103 or 104 or 105 or 106 or 107                                                                                                                                                                                                                                                                                                                                                | 6515 |
| 109 | 16 and 94 and 108                                                                                                                                                                                                                                                                                                                                                                     | 293  |

APA PsyINFO (n=15)

| Search Number | Search details                                                                                                                              | Results |
|---------------|---------------------------------------------------------------------------------------------------------------------------------------------|---------|
| 1             | exp Neoplasms/                                                                                                                              | 67126   |
| 2             | cancer*.mp. [mp=title, abstract, heading word, table of contents, key concepts, original title, tests & measures, mesh word]                | 80159   |
| 3             | tumor*.mp. [mp=title, abstract, heading word, table of contents, key concepts, original title, tests & measures, mesh word]                 | 22788   |
| 4             | neoplasm*.mp. [mp=title, abstract, heading word, table of contents, key concepts, original title, tests & measures, mesh word]              | 72346   |
| 5             | malignanc*.mp. [mp=title, abstract, heading word, table of contents, key concepts, original title, tests & measures, mesh word]             | 2664    |
| 6             | 1 or 2 or 3 or 4 or 5                                                                                                                       | 106505  |
| 7             | exp Gastrointestinal System/                                                                                                                | 3994    |
| 8             | colorectal.mp. [mp=title, abstract, heading word, table of contents, key concepts, original title, tests & measures, mesh word]             | 4383    |
| 9             | colon.mp. [mp=title, abstract, heading word, table of contents, key concepts, original title, tests & measures, mesh word]                  | 4139    |
| 10            | rectum.mp. [mp=title, abstract, heading word, table of contents, key concepts, original title, tests & measures, mesh word]                 | 521     |
| 11            | bowel.mp. [mp=title, abstract, heading word, table of contents, key concepts, original title, tests & measures, mesh word]                  | 5181    |
| 12            | lower gastrointestinal.mp. [mp=title, abstract, heading word, table of contents, key concepts, original title, tests & measures, mesh word] | 61      |
| 13            | lower GI.mp. [mp=title, abstract, heading word, table of contents, key concepts, original title, tests & measures, mesh word]               | 27      |
| 14            | 7 or 8 or 9 or 10 or 11 or 12 or 13                                                                                                         | 14811   |
| 15            | 6 and 14                                                                                                                                    | 5910    |
| 16            | exp Lifestyle Changes/ or exp Lifestyle/                                                                                                    | 15171   |
| 17            | exp Physical Activity/                                                                                                                      | 58260   |
| 18            | exp Exercise/ or exp Aerobic Exercise/ or exp Exercise Therapy/                                                                             | 35110   |

|    |                                                                                                                                                                                                                                                                                                                                                        |        |
|----|--------------------------------------------------------------------------------------------------------------------------------------------------------------------------------------------------------------------------------------------------------------------------------------------------------------------------------------------------------|--------|
| 19 | exp Nutrition/                                                                                                                                                                                                                                                                                                                                         | 79629  |
| 20 | exp Diets/                                                                                                                                                                                                                                                                                                                                             | 21820  |
| 21 | exp Dietary Supplements/                                                                                                                                                                                                                                                                                                                               | 14243  |
| 22 | exp Antioxidants/                                                                                                                                                                                                                                                                                                                                      | 3309   |
| 23 | exp Vitamins/                                                                                                                                                                                                                                                                                                                                          | 5698   |
| 24 | exp "Medicinal Herbs and Plants"/                                                                                                                                                                                                                                                                                                                      | 2764   |
| 25 | exp Glutamine/                                                                                                                                                                                                                                                                                                                                         | 767    |
| 26 | exp Fatty Acids/                                                                                                                                                                                                                                                                                                                                       | 6315   |
| 27 | exp Massage/                                                                                                                                                                                                                                                                                                                                           | 639    |
| 28 | exp Physical Contact/                                                                                                                                                                                                                                                                                                                                  | 2686   |
| 29 | exp Yoga/ or exp Meditation/ or exp Mind Body Therapy/ or exp Mindfulness/                                                                                                                                                                                                                                                                             | 24470  |
| 30 | exp Brief Psychotherapy/ or exp Geriatric Psychotherapy/ or exp Individual Psychotherapy/ or exp Psychotherapy Training/ or exp Interpersonal Psychotherapy/ or exp Psychodynamic Psychotherapy/ or exp Expressive Psychotherapy/ or exp Supportive Psychotherapy/ or exp Group Psychotherapy/ or exp Integrative Psychotherapy/ or exp Psychotherapy/ | 233755 |
| 31 | exp Movement Therapy/                                                                                                                                                                                                                                                                                                                                  | 1609   |
| 32 | exp Art/ or exp "Painting (Art)"/ or exp Art Therapy/                                                                                                                                                                                                                                                                                                  | 20790  |
| 33 | exp Music/ or exp Music Therapy/                                                                                                                                                                                                                                                                                                                       | 27177  |
| 34 | exp Dance Therapy/ or exp Dance/                                                                                                                                                                                                                                                                                                                       | 4616   |
| 35 | exp Acupuncture/                                                                                                                                                                                                                                                                                                                                       | 2026   |
| 36 | exp Visual Stimulation/                                                                                                                                                                                                                                                                                                                                | 47135  |
| 37 | exp Electrical Stimulation/                                                                                                                                                                                                                                                                                                                            | 29290  |
| 38 | 16 or 17 or 18 or 19 or 20 or 21 or 22 or 23 or 24 or 25 or 26 or 27 or 28 or 29 or 30 or 31 or 32 or 33 or 34 or 35 or 36 or 37                                                                                                                                                                                                                       | 527956 |
| 39 | Complementary.mp. [mp=title, abstract, heading word, table of contents, key concepts, original title, tests & measures, mesh word]                                                                                                                                                                                                                     | 30301  |
| 40 | lifestyle.mp. [mp=title, abstract, heading word, table of contents, key concepts, original title, tests & measures, mesh word]                                                                                                                                                                                                                         | 39198  |

|    |                                                                                                                                          |       |
|----|------------------------------------------------------------------------------------------------------------------------------------------|-------|
| 41 | physical activit*.mp. [mp=title, abstract, heading word, table of contents, key concepts, original title, tests & measures, mesh word]   | 56016 |
| 42 | exercise.mp. [mp=title, abstract, heading word, table of contents, key concepts, original title, tests & measures, mesh word]            | 82047 |
| 43 | nutrition.mp. [mp=title, abstract, heading word, table of contents, key concepts, original title, tests & measures, mesh word]           | 30186 |
| 44 | diet.mp. [mp=title, abstract, heading word, table of contents, key concepts, original title, tests & measures, mesh word]                | 38184 |
| 45 | dietary supplement*.mp. [mp=title, abstract, heading word, table of contents, key concepts, original title, tests & measures, mesh word] | 3894  |
| 46 | antioxidant*.mp. [mp=title, abstract, heading word, table of contents, key concepts, original title, tests & measures, mesh word]        | 7802  |
| 47 | vitamin E.mp. [mp=title, abstract, heading word, table of contents, key concepts, original title, tests & measures, mesh word]           | 975   |
| 48 | herb*.mp. [mp=title, abstract, heading word, table of contents, key concepts, original title, tests & measures, mesh word]               | 9624  |
| 49 | herbal extract.mp. [mp=title, abstract, heading word, table of contents, key concepts, original title, tests & measures, mesh word]      | 16    |
| 50 | goshajinkigan.mp. [mp=title, abstract, heading word, table of contents, key concepts, original title, tests & measures, mesh word]       | 7     |
| 51 | glutamine.mp. [mp=title, abstract, heading word, table of contents, key concepts, original title, tests & measures, mesh word]           | 2396  |
| 52 | kampo.mp. [mp=title, abstract, heading word, table of contents, key concepts, original title, tests & measures, mesh word]               | 92    |
| 53 | acetyl-L-carnitine.mp. [mp=title, abstract, heading word, table of contents, key concepts, original title, tests & measures, mesh word]  | 168   |
| 54 | carnitine.mp. [mp=title, abstract, heading word, table of contents, key concepts, original title, tests & measures, mesh word]           | 539   |
| 55 | alpha-lipoic acid.mp. [mp=title, abstract, heading word, table of contents, key concepts, original title, tests & measures, mesh word]   | 156   |
| 56 | omega-3.mp. [mp=title, abstract, heading word, table of contents, key concepts, original title, tests & measures, mesh word]             | 1859  |
| 57 | probiotics.mp. [mp=title, abstract, heading word, table of contents, key concepts, original title, tests & measures, mesh word]          | 621   |

|    |                                                                                                                                                            |        |
|----|------------------------------------------------------------------------------------------------------------------------------------------------------------|--------|
| 58 | massage.mp. [mp=title, abstract, heading word, table of contents, key concepts, original title, tests & measures, mesh word]                               | 1986   |
| 59 | spinal manipulation.mp. [mp=title, abstract, heading word, table of contents, key concepts, original title, tests & measures, mesh word]                   | 78     |
| 60 | manual therap*.mp. [mp=title, abstract, heading word, table of contents, key concepts, original title, tests & measures, mesh word]                        | 312    |
| 61 | heat.mp. [mp=title, abstract, heading word, table of contents, key concepts, original title, tests & measures, mesh word]                                  | 10022  |
| 62 | cold.mp. [mp=title, abstract, heading word, table of contents, key concepts, original title, tests & measures, mesh word]                                  | 13416  |
| 63 | touch therapy.mp. [mp=title, abstract, heading word, table of contents, key concepts, original title, tests & measures, mesh word]                         | 55     |
| 64 | mind-body practice.mp. [mp=title, abstract, heading word, table of contents, key concepts, original title, tests & measures, mesh word]                    | 76     |
| 65 | yoga.mp. [mp=title, abstract, heading word, table of contents, key concepts, original title, tests & measures, mesh word]                                  | 4380   |
| 66 | mediation.mp. [mp=title, abstract, heading word, table of contents, key concepts, original title, tests & measures, mesh word]                             | 51914  |
| 67 | mindfulness.mp. [mp=title, abstract, heading word, table of contents, key concepts, original title, tests & measures, mesh word]                           | 23772  |
| 68 | spiritual practices.mp. [mp=title, abstract, heading word, table of contents, key concepts, original title, tests & measures, mesh word]                   | 897    |
| 69 | psychotherapy.mp. [mp=title, abstract, heading word, table of contents, key concepts, original title, tests & measures, mesh word]                         | 170996 |
| 70 | (breathing and relaxation techniques).mp. [mp=title, abstract, heading word, table of contents, key concepts, original title, tests & measures, mesh word] | 106    |
| 71 | movement.mp. [mp=title, abstract, heading word, table of contents, key concepts, original title, tests & measures, mesh word]                              | 136325 |
| 72 | education.mp. [mp=title, abstract, heading word, table of contents, key concepts, original title, tests & measures, mesh word]                             | 619085 |
| 73 | tai chi.mp. [mp=title, abstract, heading word, table of contents, key concepts, original title, tests & measures, mesh word]                               | 864    |
| 74 | art.mp. [mp=title, abstract, heading word, table of contents, key concepts, original title, tests & measures, mesh word]                                   | 61252  |

|    |                                                                                                                                                                                                                                                                |         |
|----|----------------------------------------------------------------------------------------------------------------------------------------------------------------------------------------------------------------------------------------------------------------|---------|
| 75 | music.mp. [mp=title, abstract, heading word, table of contents, key concepts, original title, tests & measures, mesh word]                                                                                                                                     | 44743   |
| 76 | dance.mp. [mp=title, abstract, heading word, table of contents, key concepts, original title, tests & measures, mesh word]                                                                                                                                     | 8621    |
| 77 | acupuncture.mp. [mp=title, abstract, heading word, table of contents, key concepts, original title, tests & measures, mesh word]                                                                                                                               | 2967    |
| 78 | light stimulation.mp. [mp=title, abstract, heading word, table of contents, key concepts, original title, tests & measures, mesh word]                                                                                                                         | 591     |
| 79 | electrical stimulation.mp. [mp=title, abstract, heading word, table of contents, key concepts, original title, tests & measures, mesh word]                                                                                                                    | 13815   |
| 80 | magnetic stimulation.mp. [mp=title, abstract, heading word, table of contents, key concepts, original title, tests & measures, mesh word]                                                                                                                      | 14108   |
| 81 | 38 or 39 or 40 or 41 or 42 or 43 or 44 or 45 or 46 or 47 or 48 or 49 or 50 or 51 or 52 or 53 or 54 or 55 or 56 or 57 or 58 or 59 or 60 or 61 or 62 or 63 or 64 or 65 or 66 or 67 or 68 or 69 or 70 or 71 or 72 or 73 or 74 or 75 or 76 or 77 or 78 or 79 or 80 | 1480635 |
| 82 | exp Peripheral Neuropathy/                                                                                                                                                                                                                                     | 3669    |
| 83 | exp Chemotherapy/                                                                                                                                                                                                                                              | 3930    |
| 84 | peripheral neuropathy.mp. [mp=title, abstract, heading word, table of contents, key concepts, original title, tests & measures, mesh word]                                                                                                                     | 2733    |
| 85 | 82 or 84                                                                                                                                                                                                                                                       | 4787    |
| 86 | chemotherapy.mp. [mp=title, abstract, heading word, table of contents, key concepts, original title, tests & measures, mesh word]                                                                                                                              | 7968    |
| 87 | oxaliplatin.mp. [mp=title, abstract, heading word, table of contents, key concepts, original title, tests & measures, mesh word]                                                                                                                               | 181     |
| 88 | 83 or 86 or 87                                                                                                                                                                                                                                                 | 8027    |
| 89 | 85 and 88                                                                                                                                                                                                                                                      | 378     |
| 90 | chemotherapy-induced peripheral neuropathy.mp. [mp=title, abstract, heading word, table of contents, key concepts, original title, tests & measures, mesh word]                                                                                                | 233     |
| 91 | oxaliplatin-induced peripheral neuropathy.mp. [mp=title, abstract, heading word, table of contents, key concepts, original title, tests & measures, mesh word]                                                                                                 | 18      |
| 92 | CIPN.mp. [mp=title, abstract, heading word, table of contents, key concepts, original title, tests & measures, mesh word]                                                                                                                                      | 170     |

|    |                                                                                                                             |     |
|----|-----------------------------------------------------------------------------------------------------------------------------|-----|
| 93 | OIPN.mp. [mp=title, abstract, heading word, table of contents, key concepts, original title, tests & measures, mesh word]   | 9   |
| 94 | OXAIPN.mp. [mp=title, abstract, heading word, table of contents, key concepts, original title, tests & measures, mesh word] | 2   |
| 95 | 89 or 90 or 91 or 92 or 93 or 94                                                                                            | 389 |
| 96 | 15 and 81 and 95                                                                                                            | 15  |

AMED (n=3)

| Search Number | Search details                                                                         | Results |
|---------------|----------------------------------------------------------------------------------------|---------|
| 1             | exp Neoplasms/                                                                         | 18186   |
| 2             | cancer*.mp. [mp=abstract, heading words, title]                                        | 15968   |
| 3             | tumor*.mp. [mp=abstract, heading words, title]                                         | 5626    |
| 4             | neoplasm*.mp. [mp=abstract, heading words, title]                                      | 17544   |
| 5             | malignanc*.mp. [mp=abstract, heading words, title]                                     | 661     |
| 6             | 1 or 2 or 3 or 4 or 5                                                                  | 24484   |
| 7             | exp Colon/                                                                             | 116     |
| 8             | exp Rectum/                                                                            | 30      |
| 9             | colorectal.mp. [mp=abstract, heading words, title]                                     | 724     |
| 10            | colon.mp. [mp=abstract, heading words, title]                                          | 1010    |
| 11            | rectum.mp. [mp=abstract, heading words, title]                                         | 113     |
| 12            | bowel.mp. [mp=abstract, heading words, title]                                          | 1292    |
| 13            | lower gastrointestinal.mp. [mp=abstract, heading words, title]                         | 4       |
| 14            | lower GI.mp. [mp=abstract, heading words, title]                                       | 5       |
| 15            | 7 or 8 or 9 or 10 or 11 or 12 or 13 or 14                                              | 2784    |
| 16            | 6 and 15                                                                               | 1348    |
| 17            | exp Complementary therapies/                                                           | 68335   |
| 18            | exp Complementary medicine/                                                            | 71694   |
| 19            | exp Life style/                                                                        | 2073    |
| 20            | exp Exercise/ or exp Rehabilitation/ or exp Physical fitness/ or exp Exercise therapy/ | 81117   |
| 21            | exp Diet/ or exp Nutrition/ or exp Dietary supplements/                                | 6153    |
| 22            | exp Plant extracts/ or exp Antioxidants/                                               | 37435   |
| 23            | exp Vitamins/ or exp Herbal drugs/                                                     | 16102   |
| 24            | exp herbs/                                                                             | 1901    |

|    |                                                                                                                                                                      |        |
|----|----------------------------------------------------------------------------------------------------------------------------------------------------------------------|--------|
| 25 | exp Amino acids/                                                                                                                                                     | 561    |
| 26 | exp Medicine kampo/                                                                                                                                                  | 232    |
| 27 | exp Carnitine/                                                                                                                                                       | 25     |
| 28 | exp Fatty acids/                                                                                                                                                     | 760    |
| 29 | exp Probiotics/                                                                                                                                                      | 188    |
| 30 | exp Aroma therapy/ or exp Massage/                                                                                                                                   | 3577   |
| 31 | exp Spinal manipulation/                                                                                                                                             | 994    |
| 32 | exp Heat/ or exp Cold/                                                                                                                                               | 562    |
| 33 | exp Therapeutic touch/                                                                                                                                               | 209    |
| 34 | exp Mind body medicine/                                                                                                                                              | 244    |
| 35 | exp Meditation/ or exp Yoga/                                                                                                                                         | 1552   |
| 36 | exp Psychotherapy/ or exp Relaxation/                                                                                                                                | 11432  |
| 37 | exp Movement/                                                                                                                                                        | 27665  |
| 38 | exp Education/                                                                                                                                                       | 21914  |
| 39 | exp Tai chi/                                                                                                                                                         | 421    |
| 40 | exp Art/                                                                                                                                                             | 254    |
| 41 | exp Music/                                                                                                                                                           | 278    |
| 42 | exp Dancing/ or exp Dance therapy/                                                                                                                                   | 641    |
| 43 | exp Acupuncture/ or exp Acupuncture therapy/                                                                                                                         | 12133  |
| 44 | exp Electric stimulation/                                                                                                                                            | 1284   |
| 45 | 17 or 18 or 19 or 20 or 21 or 22 or 23 or 24 or 25 or 26 or 27 or 28 or 29 or 30 or 31 or 32 or 33 or 34 or 35 or 36 or 37 or 38 or 39 or 40 or 41 or 42 or 43 or 44 | 218894 |
| 46 | Complementary.mp. [mp=abstract, heading words, title]                                                                                                                | 10530  |
| 47 | lifestyle.mp. [mp=abstract, heading words, title]                                                                                                                    | 2427   |
| 48 | physical activit*.mp. [mp=abstract, heading words, title]                                                                                                            | 5441   |
| 49 | exercise.mp. [mp=abstract, heading words, title]                                                                                                                     | 29015  |
| 50 | nutrition.mp. [mp=abstract, heading words, title]                                                                                                                    | 3612   |
| 51 | diet.mp. [mp=abstract, heading words, title]                                                                                                                         | 5940   |

|    |                                                                               |       |
|----|-------------------------------------------------------------------------------|-------|
| 52 | dietary supplement*.mp. [mp=abstract, heading words, title]                   | 2219  |
| 53 | antioxidant*.mp. [mp=abstract, heading words, title]                          | 5179  |
| 54 | vitamin E.mp. [mp=abstract, heading words, title]                             | 437   |
| 55 | herb*.mp. [mp=abstract, heading words, title]                                 | 18645 |
| 56 | herbal extract.mp. [mp=abstract, heading words, title]                        | 64    |
| 57 | goshajinkigan.mp. [mp=abstract, heading words, title]                         | 10    |
| 58 | glutamine.mp. [mp=abstract, heading words, title]                             | 93    |
| 59 | kampo.mp. [mp=abstract, heading words, title]                                 | 339   |
| 60 | acetyl-L-carnitine.mp. [mp=abstract, heading words, title]                    | 15    |
| 61 | carnitine.mp. [mp=abstract, heading words, title]                             | 123   |
| 62 | alpha-lipoic acid.mp. [mp=abstract, heading words, title]                     | 39    |
| 63 | omega-3.mp. [mp=abstract, heading words, title]                               | 215   |
| 64 | probiotics.mp. [mp=abstract, heading words, title]                            | 260   |
| 65 | massage.mp. [mp=abstract, heading words, title]                               | 3634  |
| 66 | spinal manipulation.mp. [mp=abstract, heading words, title]                   | 1224  |
| 67 | manual therap*.mp. [mp=abstract, heading words, title]                        | 1026  |
| 68 | heat.mp. [mp=abstract, heading words, title]                                  | 1770  |
| 69 | cold.mp. [mp=abstract, heading words, title]                                  | 1767  |
| 70 | touch therapy.mp. [mp=abstract, heading words, title]                         | 19    |
| 71 | mind-body practice.mp. [mp=abstract, heading words, title]                    | 15    |
| 72 | yoga.mp. [mp=abstract, heading words, title]                                  | 1306  |
| 73 | mediation.mp. [mp=abstract, heading words, title]                             | 320   |
| 74 | mindfulness.mp. [mp=abstract, heading words, title]                           | 701   |
| 75 | spiritual practices.mp. [mp=abstract, heading words, title]                   | 30    |
| 76 | psychotherapy.mp. [mp=abstract, heading words, title]                         | 2762  |
| 77 | (breathing and relaxation techniques).mp. [mp=abstract, heading words, title] | 19    |
| 78 | movement.mp. [mp=abstract, heading words, title]                              | 14123 |

|     |                                                                                                                                                                                                                                                                |        |
|-----|----------------------------------------------------------------------------------------------------------------------------------------------------------------------------------------------------------------------------------------------------------------|--------|
| 79  | education.mp. [mp=abstract, heading words, title]                                                                                                                                                                                                              | 23322  |
| 80  | tai chi.mp. [mp=abstract, heading words, title]                                                                                                                                                                                                                | 527    |
| 81  | art.mp. [mp=abstract, heading words, title]                                                                                                                                                                                                                    | 2820   |
| 82  | music.mp. [mp=abstract, heading words, title]                                                                                                                                                                                                                  | 1688   |
| 83  | dance.mp. [mp=abstract, heading words, title]                                                                                                                                                                                                                  | 574    |
| 84  | acupuncture.mp. [mp=abstract, heading words, title]                                                                                                                                                                                                            | 11191  |
| 85  | light stimulation.mp. [mp=abstract, heading words, title]                                                                                                                                                                                                      | 3      |
| 86  | electrical stimulation.mp. [mp=abstract, heading words, title]                                                                                                                                                                                                 | 1901   |
| 87  | magnetic stimulation.mp. [mp=abstract, heading words, title]                                                                                                                                                                                                   | 530    |
| 88  | 45 or 46 or 47 or 48 or 49 or 50 or 51 or 52 or 53 or 54 or 55 or 56 or 57 or 58 or 59 or 60 or 61 or 62 or 63 or 64 or 65 or 66 or 67 or 68 or 69 or 70 or 71 or 72 or 73 or 74 or 75 or 76 or 77 or 78 or 79 or 80 or 81 or 82 or 83 or 84 or 85 or 86 or 87 | 234025 |
| 89  | exp Peripheral nervous system disease/                                                                                                                                                                                                                         | 4265   |
| 90  | peripheral neuropath*.mp. [mp=abstract, heading words, title]                                                                                                                                                                                                  | 581    |
| 91  | 89 or 90                                                                                                                                                                                                                                                       | 4442   |
| 92  | chemotherapy.mp. [mp=abstract, heading words, title]                                                                                                                                                                                                           | 1860   |
| 93  | oxaliplatin.mp. [mp=abstract, heading words, title]                                                                                                                                                                                                            | 33     |
| 94  | 92 or 93                                                                                                                                                                                                                                                       | 1872   |
| 95  | 91 and 94                                                                                                                                                                                                                                                      | 82     |
| 96  | chemotherapy-induced peripheral neuropathy.mp. [mp=abstract, heading words, title]                                                                                                                                                                             | 52     |
| 97  | oxaliplatin-induced peripheral neuropathy.mp. [mp=abstract, heading words, title]                                                                                                                                                                              | 2      |
| 98  | CIPN.mp. [mp=abstract, heading words, title]                                                                                                                                                                                                                   | 41     |
| 99  | OIPN.mp. [mp=abstract, heading words, title]                                                                                                                                                                                                                   | 0      |
| 100 | OXAIPN.mp. [mp=abstract, heading words, title]                                                                                                                                                                                                                 | 0      |
| 101 | 95 or 96 or 97 or 98 or 99 or 100                                                                                                                                                                                                                              | 82     |
| 102 | 16 and 88 and 101                                                                                                                                                                                                                                              | 3      |

**Web of Science (n=414)**

| <b>Search Number</b> | <b>Search details</b>                                                                                                                                                                                                                                                                                                                                              | <b>Results</b> |
|----------------------|--------------------------------------------------------------------------------------------------------------------------------------------------------------------------------------------------------------------------------------------------------------------------------------------------------------------------------------------------------------------|----------------|
| 1                    | (ALL=(cancer* OR tumor* OR neoplasm* OR malignanc*)) AND ALL=(colorectal OR colon OR rectum OR bowel OR lower gastrointestinal OR lower GI)                                                                                                                                                                                                                        | 488958         |
| 2                    | ALL=(Complementary OR lifestyle OR physical activit* OR exercise OR nutrition OR diet OR dietary supplement* OR antioxidant* OR vitamin E OR herb* OR herbal extract OR goshajinkigan OR glutamine OR kampo OR acetyl-L-carnitine OR carnitine OR alpha-lipoic acid OR omega-3 OR probiotics OR massage OR spinal manipulation OR manual therap* OR heat OR cold ) | 7155531        |
| 3                    | ALL=(touch therapy OR mind-body practice OR yoga OR mediation OR mindfulness OR spiritual practices OR psychotherapy OR breathing and relaxation techniques OR movement OR education OR tai chi OR art OR music OR dance OR acupuncture OR light stimulation OR electrical stimulation OR magnetic stimulation )                                                   | 10199289       |
| 4                    | #2 OR #3                                                                                                                                                                                                                                                                                                                                                           | 16254167       |
| 5                    | (ALL=(peripheral neuropath*)) AND ALL=(chemotherapy OR oxaliplatin)                                                                                                                                                                                                                                                                                                | 7105           |
| 6                    | ALL=(chemotherapy-induced peripheral neuropathy OR oxaliplatin-induced peripheral neuropathy OR CIPN OR OIPN OR OXAIPN )                                                                                                                                                                                                                                           | 3630           |
| 7                    | #6 OR #5                                                                                                                                                                                                                                                                                                                                                           | 7253           |
| 8                    | #7 AND #4 AND #1                                                                                                                                                                                                                                                                                                                                                   | 414            |

**Cochrane Library (n=443)**

| <b>Search Number</b> | <b>Search details</b>                                             | <b>Results</b> |
|----------------------|-------------------------------------------------------------------|----------------|
| #1                   | MeSH descriptor: [Neoplasms] explode all trees                    | 128820         |
| #2                   | cancer*                                                           | 245660         |
| #3                   | tumor*                                                            | 93010          |
| #4                   | neoplasm*                                                         | 126880         |
| #5                   | malignanc*                                                        | 16921          |
| #6                   | #1 OR #2 OR #3 OR #4 OR #5                                        | 303455         |
| #7                   | MeSH descriptor: [Colon] explode all trees                        | 2032           |
| #8                   | MeSH descriptor: [Rectum] explode all trees                       | 1901           |
| #9                   | MeSH descriptor: [Lower Gastrointestinal Tract] explode all trees | 5069           |
| #10                  | colorectal                                                        | 26806          |
| #11                  | colon                                                             | 18367          |
| #12                  | rectum                                                            | 10429          |
| #13                  | bowel                                                             | 27350          |
| #14                  | lower gastrointestinal                                            | 13405          |
| #15                  | lower GI                                                          | 3044           |
| #16                  | #7 OR #8 OR #9 OR #10 OR #11 OR #12 OR #13 OR #14 OR #15          | 76781          |
| #17                  | #6 AND #16                                                        | 36395          |

|     |                                                                    |       |
|-----|--------------------------------------------------------------------|-------|
| #18 | MeSH descriptor: [Life Style] explode all trees                    | 9041  |
| #19 | MeSH descriptor: [Exercise] explode all trees                      | 40288 |
| #20 | MeSH descriptor: [Diet] explode all trees                          | 27246 |
| #21 | MeSH descriptor: [Dietary Supplements] explode all trees           | 20765 |
| #22 | MeSH descriptor: [Antioxidants] explode all trees                  | 6689  |
| #23 | MeSH descriptor: [Vitamin E] explode all trees                     | 3162  |
| #24 | MeSH descriptor: [Glutamine] explode all trees                     | 848   |
| #25 | MeSH descriptor: [Medicine, Kampo] explode all trees               | 67    |
| #26 | MeSH descriptor: [Acetylcarnitine] explode all trees               | 172   |
| #27 | MeSH descriptor: [Carnitine] explode all trees                     | 838   |
| #28 | MeSH descriptor: [Fatty Acids, Omega-3] explode all trees          | 4527  |
| #29 | MeSH descriptor: [Probiotics] explode all trees                    | 3862  |
| #30 | MeSH descriptor: [Massage] explode all trees                       | 1757  |
| #31 | MeSH descriptor: [Manipulation, Spinal] explode all trees          | 561   |
| #32 | MeSH descriptor: [Musculoskeletal Manipulations] explode all trees | 4495  |
| #33 | MeSH descriptor: [Cold Temperature] explode all trees              | 2013  |
| #34 | MeSH descriptor: [Mind-Body Therapies] explode all trees           | 9812  |
| #35 | MeSH descriptor: [Yoga] explode all trees                          | 1286  |
| #36 | MeSH descriptor: [Negotiating] explode all trees                   | 171   |

|     |                                                                                                                                                                                                         |        |
|-----|---------------------------------------------------------------------------------------------------------------------------------------------------------------------------------------------------------|--------|
| #37 | MeSH descriptor: [Mindfulness] explode all trees                                                                                                                                                        | 2535   |
| #38 | MeSH descriptor: [Psychotherapy] explode all trees                                                                                                                                                      | 36788  |
| #39 | MeSH descriptor: [Relaxation Therapy] explode all trees                                                                                                                                                 | 2776   |
| #40 | MeSH descriptor: [Movement] explode all trees                                                                                                                                                           | 50123  |
| #41 | MeSH descriptor: [Education] explode all trees                                                                                                                                                          | 46953  |
| #42 | MeSH descriptor: [Tai Ji] explode all trees                                                                                                                                                             | 610    |
| #43 | MeSH descriptor: [Art] explode all trees                                                                                                                                                                | 441    |
| #44 | MeSH descriptor: [Music] explode all trees                                                                                                                                                              | 1260   |
| #45 | MeSH descriptor: [Dancing] explode all trees                                                                                                                                                            | 300    |
| #46 | MeSH descriptor: [Acupuncture] explode all trees                                                                                                                                                        | 225    |
| #47 | #18 OR #19 OR #20 OR #21 OR #22 OR #23 OR #24 OR #25 OR #26 OR #27 OR #28 OR #29 OR #30 OR #31 OR #32 OR #33 OR #34 OR #35 OR #36 OR #37 OR #38 OR #39 OR #40 OR #41 OR #42 OR #43 OR #44 OR #45 OR #46 | 179147 |
| #48 | Complementary                                                                                                                                                                                           | 18480  |
| #49 | lifestyle                                                                                                                                                                                               | 31904  |
| #50 | physical activit*                                                                                                                                                                                       | 77196  |
| #51 | exercise                                                                                                                                                                                                | 147366 |
| #52 | nutrition                                                                                                                                                                                               | 71219  |
| #53 | diet                                                                                                                                                                                                    | 84043  |
| #54 | dietary supplement*                                                                                                                                                                                     | 32850  |

|     |                     |       |
|-----|---------------------|-------|
| #55 | antioxidant*        | 18085 |
| #56 | vitamin E           | 13222 |
| #57 | herb*               | 19149 |
| #58 | herbal extract      | 2025  |
| #59 | goshajinkigan       | 53    |
| #60 | glutamine           | 2492  |
| #61 | kampo               | 401   |
| #62 | acetyl-L-carnitine  | 286   |
| #63 | carnitine           | 226   |
| #64 | alpha-lipoic acid   | 648   |
| #65 | omega-3             | 7712  |
| #66 | probiotics          | 8900  |
| #67 | massage             | 8769  |
| #68 | spinal manipulation | 1671  |
| #69 | manual therap*      | 17175 |
| #70 | heat                | 11798 |
| #71 | cold                | 16064 |
| #72 | touch therapy       | 2262  |
| #73 | mind-body practice  | 549   |

|     |                                                                                                                                                                                                                                                                                                    |        |
|-----|----------------------------------------------------------------------------------------------------------------------------------------------------------------------------------------------------------------------------------------------------------------------------------------------------|--------|
| #74 | yoga                                                                                                                                                                                                                                                                                               | 6705   |
| #75 | mediation                                                                                                                                                                                                                                                                                          | 4061   |
| #76 | mindfulness                                                                                                                                                                                                                                                                                        | 10997  |
| #77 | spiritual practices                                                                                                                                                                                                                                                                                | 236    |
| #78 | psychotherapy                                                                                                                                                                                                                                                                                      | 20676  |
| #79 | breathing and relaxation techniques                                                                                                                                                                                                                                                                | 813    |
| #80 | movement                                                                                                                                                                                                                                                                                           | 45740  |
| #81 | education                                                                                                                                                                                                                                                                                          | 118734 |
| #82 | tai chi                                                                                                                                                                                                                                                                                            | 2358   |
| #83 | art                                                                                                                                                                                                                                                                                                | 20331  |
| #84 | music                                                                                                                                                                                                                                                                                              | 8352   |
| #85 | dance                                                                                                                                                                                                                                                                                              | 1665   |
| #86 | acupuncture                                                                                                                                                                                                                                                                                        | 23377  |
| #87 | light stimulation                                                                                                                                                                                                                                                                                  | 1922   |
| #88 | electrical stimulation                                                                                                                                                                                                                                                                             | 13852  |
| #89 | magnetic stimulation                                                                                                                                                                                                                                                                               | 12149  |
| #90 | #48 OR #49 OR #50 OR #51 OR #52 OR #53 OR #54 OR #55 OR #56 OR #57 OR #58 OR #59 OR #60 OR #61 OR #62 OR #63 OR #64 OR #65 OR #66 OR #67 OR #68 OR #69 OR #70 OR #71 OR #72 OR #73 OR #74 OR #75 OR #76 OR #77 OR #78 OR #79 OR #80 OR #81 OR #82 OR #83 OR #84 OR #85 OR #86 OR #87 OR #88 OR #89 | 587257 |

|      |                                                                         |        |
|------|-------------------------------------------------------------------------|--------|
| #91  | #47 OR #90                                                              | 619567 |
| #92  | MeSH descriptor: [Peripheral Nervous System Diseases] explode all trees | 8527   |
| #93  | peripheral neuropathy                                                   | 7996   |
| #94  | # 92 OR #93                                                             | 87013  |
| #95  | chemotherapy                                                            | 106406 |
| #96  | MeSH descriptor: [Oxaliplatin] explode all trees                        | 1860   |
| #97  | oxaliplatin                                                             | 6095   |
| #98  | #95 OR #96 OR #97                                                       | 107707 |
| #99  | #94 AND #98                                                             | 9018   |
| #100 | chemotherapy-induced peripheral neuropathy                              | 942    |
| #101 | oxaliplatin-induced peripheral neuropathy                               | 157    |
| #102 | CIPN                                                                    | 636    |
| #103 | OIPN                                                                    | 47     |
| #104 | OXAIPN                                                                  | 5      |
| #105 | #100 OR #101 OR #102 OR #103 OR #104                                    | 1121   |
| #106 | #99 OR #105                                                             | 9063   |
| #107 | #17 AND #91 AND #106                                                    | 443    |

CNKI (n=381)

| <b>Search Number</b> | <b>Search details</b>                                                                                                                                                                                                                                                                        | <b>Results</b> |
|----------------------|----------------------------------------------------------------------------------------------------------------------------------------------------------------------------------------------------------------------------------------------------------------------------------------------|----------------|
| 1                    | SU%=(结直肠 + 结肠 + 直肠 + 肠道 + 下消化道 + 下消化系统) * (肿瘤 + 癌) AND SU%=(补充治疗 + 生活方式 + 身体活动 + 运动 + 营养 + 饮食 + 膳食补充剂 + 抗氧化剂 + 维他命 E + 草药 + 草本提取物 + 益生菌 + 按摩 + 脊椎调整 + 手动治疗 + 热疗 + 冷疗 + 触觉疗法 + 身心实践 + 瑜伽 + 冥想 + 正念 + 精神实践 + 心理治疗 + 呼吸与放松技巧 + 运动 + 教育 + 太极 + 艺术 + 音乐 + 舞蹈 + 针灸 + 光刺激 + 电刺激 + 磁刺激) AND SU%=(化疗) | 381            |
